# Supplementary material for: Design principle of disordered rocksalt type overlithiated anode for high energy density batteries
Source: Royal Society of Chemistry journal article supplement (doi:10.1039/d4mh00715h), 2024-01-01
Supplement: d4mh00715h1.xlsx [file d4mh00715h1.xlsx]

## Sheet: Sheet1
Chemical formula	Energy (eV/atom)
Li3Ti2O5/str0	-7.24908
Li3Ti2O5/str3	-7.24365
Li3Ti2O5/str15	-7.25167
Li3Ti2O5/str14	-7.19102
Li3Ti2O5/str11	-7.23809
Li3Ti2O5/str2	-7.25396
Li3Ti2O5/str7	-7.2506
Li3Ti2O5/str6	-7.25587
Li3Ti2O5/str4	-7.26003
Li3Ti2O5/str1	-7.25235
Li3Ti2O5/str8	-7.24884
Li3Ti2O5/str12	-7.24865
Li3Ti2O5/str9	-7.25028
Li3Ti2O5/str13	-7.25106
Li3Ti2O5/str10	-7.25158
Li3Ti2O5/str5	-7.2576
Li3Ti2O5/Li15Ti8O20/order9	-6.8482
Li3Ti2O5/Li15Ti8O20/order10	-6.84953
Li3Ti2O5/Li15Ti8O20/order28	-6.84845
Li3Ti2O5/Li15Ti8O20/order0	-6.84993
Li3Ti2O5/Li15Ti8O20/order4	-6.84877
Li3Ti2O5/Li15Ti8O20/order12	-6.84947
Li3Ti2O5/Li15Ti8O20/order17	-6.8495
Li3Ti2O5/Li15Ti8O20/order23	-6.83594
Li3Ti2O5/Li15Ti8O20/order16	-6.83912
Li3Ti2O5/Li15Ti8O20/order2	-6.84599
Li3Ti2O5/Li15Ti8O20/order18	-6.84841
Li3Ti2O5/Li15Ti8O20/order6	-6.84763
Li3Ti2O5/Li15Ti8O20/order15	-6.84759
Li3Ti2O5/Li15Ti8O20/order8	-6.84954
Li3Ti2O5/Li15Ti8O20/order14	-6.84643
Li3Ti2O5/Li15Ti8O20/order7	-6.84494
Li3Ti2O5/Li15Ti8O20/order21	-6.84834
Li3Ti2O5/Li15Ti8O20/order19	-6.8411
Li3Ti2O5/Li15Ti8O20/order26	-6.84945
Li3Ti2O5/Li15Ti8O20/order13	-6.83969
Li3Ti2O5/Li15Ti8O20/order11	-6.84641
Li3Ti2O5/Li15Ti8O20/order27	-6.84423
Li3Ti2O5/Li15Ti8O20/order5	-6.84843
Li3Ti2O5/Li15Ti8O20/order1	-6.84832
Li3Ti2O5/Li15Ti8O20/order3	-6.85001
Li3Ti2O5/Li15Ti8O20/order24	-6.84961
Li3Ti2O5/Li15Ti8O20/order25	-6.84166
Li3Ti2O5/Li15Ti8O20/order22	-6.83613
Li3Ti2O5/Li15Ti8O20/order20	-6.84834
Li3Ti2O5/Li29Ti16O40/order0	-6.91328
Li3Ti2O5/Li29Ti16O40/order4	-6.91201
Li3Ti2O5/Li29Ti16O40/order2	-6.91574
Li3Ti2O5/Li29Ti16O40/order6	-6.91439
Li3Ti2O5/Li29Ti16O40/order5	-6.91645
Li3Ti2O5/Li29Ti16O40/order1	-6.9144
Li3Ti2O5/Li29Ti16O40/order3	-6.91339
Li3Ti2O5/Li17Ti8O20/order9	-6.57614
Li3Ti2O5/Li17Ti8O20/order10	-6.57999
Li3Ti2O5/Li17Ti8O20/order0	-6.57885
Li3Ti2O5/Li17Ti8O20/order4	-6.56488
Li3Ti2O5/Li17Ti8O20/order12	-6.57976
Li3Ti2O5/Li17Ti8O20/order17	-6.55884
Li3Ti2O5/Li17Ti8O20/order23	-6.57842
Li3Ti2O5/Li17Ti8O20/order16	-6.55578
Li3Ti2O5/Li17Ti8O20/order2	-6.57583
Li3Ti2O5/Li17Ti8O20/order18	-6.56737
Li3Ti2O5/Li17Ti8O20/order6	-6.57177
Li3Ti2O5/Li17Ti8O20/order15	-6.57197
Li3Ti2O5/Li17Ti8O20/order8	-6.572
Li3Ti2O5/Li17Ti8O20/order14	-6.57891
Li3Ti2O5/Li17Ti8O20/order7	-6.57375
Li3Ti2O5/Li17Ti8O20/order21	-6.5785
Li3Ti2O5/Li17Ti8O20/order19	-6.57603
Li3Ti2O5/Li17Ti8O20/order13	-6.57983
Li3Ti2O5/Li17Ti8O20/order11	-6.57613
Li3Ti2O5/Li17Ti8O20/order5	-6.57503
Li3Ti2O5/Li17Ti8O20/order1	-6.57393
Li3Ti2O5/Li17Ti8O20/order3	-6.57933
Li3Ti2O5/Li17Ti8O20/order24	-6.57602
Li3Ti2O5/Li17Ti8O20/order25	-6.57886
Li3Ti2O5/Li17Ti8O20/order22	-6.57516
Li3Ti2O5/Li17Ti8O20/order20	-6.57192
Li3Ti2O5/Li25Ti16O40/order0	-7.18894
Li3Ti2O5/Li25Ti16O40/order4	-7.17348
Li3Ti2O5/Li25Ti16O40/order2	-7.18072
Li3Ti2O5/Li25Ti16O40/order6	-7.18895
Li3Ti2O5/Li25Ti16O40/order7	-7.18374
Li3Ti2O5/Li25Ti16O40/order5	-7.17323
Li3Ti2O5/Li25Ti16O40/order1	-7.18346
Li3Ti2O5/Li25Ti16O40/order3	-7.18368
Li3Ti2O5/Li5Ti2O5/order9	-6.24325
Li3Ti2O5/Li5Ti2O5/order10	-6.24801
Li3Ti2O5/Li5Ti2O5/order28	-6.27415
Li3Ti2O5/Li5Ti2O5/order0	-6.22028
Li3Ti2O5/Li5Ti2O5/order4	-6.20595
Li3Ti2O5/Li5Ti2O5/order12	-6.2231
Li3Ti2O5/Li5Ti2O5/order17	-6.20401
Li3Ti2O5/Li5Ti2O5/order23	-6.23188
Li3Ti2O5/Li5Ti2O5/order16	-6.26573
Li3Ti2O5/Li5Ti2O5/order2	-6.20401
Li3Ti2O5/Li5Ti2O5/order18	-6.2262
Li3Ti2O5/Li5Ti2O5/order6	-6.27041
Li3Ti2O5/Li5Ti2O5/order15	-6.27437
Li3Ti2O5/Li5Ti2O5/order8	-6.25312
Li3Ti2O5/Li5Ti2O5/order14	-6.22479
Li3Ti2O5/Li5Ti2O5/order7	-6.26883
Li3Ti2O5/Li5Ti2O5/order21	-6.22127
Li3Ti2O5/Li5Ti2O5/order19	-6.22518
Li3Ti2O5/Li5Ti2O5/order26	-6.19788
Li3Ti2O5/Li5Ti2O5/order13	-6.20753
Li3Ti2O5/Li5Ti2O5/order11	-6.22515
Li3Ti2O5/Li5Ti2O5/order27	-6.26759
Li3Ti2O5/Li5Ti2O5/order5	-6.26095
Li3Ti2O5/Li5Ti2O5/order1	-6.26198
Li3Ti2O5/Li5Ti2O5/order3	-6.23194
Li3Ti2O5/Li5Ti2O5/order24	-6.23562
Li3Ti2O5/Li5Ti2O5/order25	-6.23448
Li3Ti2O5/Li5Ti2O5/order22	-6.24277
Li3Ti2O5/Li5Ti2O5/order20	-6.2647
Li3Ti2O5/Li19Ti8O20/order9	-6.35048
Li3Ti2O5/Li19Ti8O20/order10	-6.34811
Li3Ti2O5/Li19Ti8O20/order28	-6.36034
Li3Ti2O5/Li19Ti8O20/order0	-6.34488
Li3Ti2O5/Li19Ti8O20/order4	-6.32355
Li3Ti2O5/Li19Ti8O20/order12	-6.34128
Li3Ti2O5/Li19Ti8O20/order31	-6.3528
Li3Ti2O5/Li19Ti8O20/order17	-6.37349
Li3Ti2O5/Li19Ti8O20/order23	-6.35068
Li3Ti2O5/Li19Ti8O20/order16	-6.36013
Li3Ti2O5/Li19Ti8O20/order2	-6.36005
Li3Ti2O5/Li19Ti8O20/order18	-6.36021
Li3Ti2O5/Li19Ti8O20/order6	-6.3142
Li3Ti2O5/Li19Ti8O20/order15	-6.35406
Li3Ti2O5/Li19Ti8O20/order8	-6.35102
Li3Ti2O5/Li19Ti8O20/order29	-6.40041
Li3Ti2O5/Li19Ti8O20/order14	-6.3422
Li3Ti2O5/Li19Ti8O20/order7	-6.34526
Li3Ti2O5/Li19Ti8O20/order21	-6.32212
Li3Ti2O5/Li19Ti8O20/order19	-6.34572
Li3Ti2O5/Li19Ti8O20/order26	-6.33234
Li3Ti2O5/Li19Ti8O20/order13	-6.36752
Li3Ti2O5/Li19Ti8O20/order11	-6.36839
Li3Ti2O5/Li19Ti8O20/order27	-6.35269
Li3Ti2O5/Li19Ti8O20/order5	-6.32326
Li3Ti2O5/Li19Ti8O20/order1	-6.35715
Li3Ti2O5/Li19Ti8O20/order3	-6.34606
Li3Ti2O5/Li19Ti8O20/order24	-6.35271
Li3Ti2O5/Li19Ti8O20/order25	-6.35099
Li3Ti2O5/Li19Ti8O20/order22	-6.36035
Li3Ti2O5/Li19Ti8O20/order20	-6.35916
Li3Ti2O5/Li19Ti8O20/order30	-6.35679
Li3Ti2O5/Li27Ti16O40/order0	-7.0492
Li3Ti2O5/Li27Ti16O40/order4	-7.04777
Li3Ti2O5/Li27Ti16O40/order2	-7.05051
Li3Ti2O5/Li27Ti16O40/order6	-7.04927
Li3Ti2O5/Li27Ti16O40/order5	-7.0511
Li3Ti2O5/Li27Ti16O40/order1	-7.04948
Li3Ti2O5/Li27Ti16O40/order3	-7.04832
Li3Ti2O5/Li31Ti16O40/order9	-6.78453
Li3Ti2O5/Li31Ti16O40/order10	-6.78458
Li3Ti2O5/Li31Ti16O40/order28	-6.77148
Li3Ti2O5/Li31Ti16O40/order0	-6.78458
Li3Ti2O5/Li31Ti16O40/order4	-6.78457
Li3Ti2O5/Li31Ti16O40/order12	-6.78442
Li3Ti2O5/Li31Ti16O40/order17	-6.77715
Li3Ti2O5/Li31Ti16O40/order23	-6.77504
Li3Ti2O5/Li31Ti16O40/order16	-6.78463
Li3Ti2O5/Li31Ti16O40/order2	-6.78431
Li3Ti2O5/Li31Ti16O40/order18	-6.78432
Li3Ti2O5/Li31Ti16O40/order6	-6.77729
Li3Ti2O5/Li31Ti16O40/order15	-6.77324
Li3Ti2O5/Li31Ti16O40/order8	-6.78457
Li3Ti2O5/Li31Ti16O40/order14	-6.78451
Li3Ti2O5/Li31Ti16O40/order7	-6.78444
Li3Ti2O5/Li31Ti16O40/order21	-6.78459
Li3Ti2O5/Li31Ti16O40/order19	-6.77511
Li3Ti2O5/Li31Ti16O40/order26	-6.78457
Li3Ti2O5/Li31Ti16O40/order13	-6.77663
Li3Ti2O5/Li31Ti16O40/order11	-6.78442
Li3Ti2O5/Li31Ti16O40/order27	-6.78448
Li3Ti2O5/Li31Ti16O40/order5	-6.7762
Li3Ti2O5/Li31Ti16O40/order1	-6.78381
Li3Ti2O5/Li31Ti16O40/order3	-6.77436
Li3Ti2O5/Li31Ti16O40/order24	-6.77204
Li3Ti2O5/Li31Ti16O40/order25	-6.77506
Li3Ti2O5/Li31Ti16O40/order22	-6.77265
Li3Ti2O5/Li31Ti16O40/order20	-6.78456
Li3Ti2O5/Li9Ti4O10/order9	-6.44686
Li3Ti2O5/Li9Ti4O10/order10	-6.44923
Li3Ti2O5/Li9Ti4O10/order33	-6.48293
Li3Ti2O5/Li9Ti4O10/order36	-6.4929
Li3Ti2O5/Li9Ti4O10/order28	-6.47485
Li3Ti2O5/Li9Ti4O10/order0	-6.44592
Li3Ti2O5/Li9Ti4O10/order4	-6.44951
Li3Ti2O5/Li9Ti4O10/order35	-6.45836
Li3Ti2O5/Li9Ti4O10/order12	-6.46792
Li3Ti2O5/Li9Ti4O10/order31	-6.43886
Li3Ti2O5/Li9Ti4O10/order17	-6.49288
Li3Ti2O5/Li9Ti4O10/order23	-6.46197
Li3Ti2O5/Li9Ti4O10/order16	-6.46941
Li3Ti2O5/Li9Ti4O10/order2	-6.44924
Li3Ti2O5/Li9Ti4O10/order18	-6.44947
Li3Ti2O5/Li9Ti4O10/order6	-6.44445
Li3Ti2O5/Li9Ti4O10/order15	-6.44948
Li3Ti2O5/Li9Ti4O10/order8	-6.48006
Li3Ti2O5/Li9Ti4O10/order29	-6.47041
Li3Ti2O5/Li9Ti4O10/order14	-6.43952
Li3Ti2O5/Li9Ti4O10/order7	-6.45915
Li3Ti2O5/Li9Ti4O10/order21	-6.47985
Li3Ti2O5/Li9Ti4O10/order32	-6.47619
Li3Ti2O5/Li9Ti4O10/order37	-6.49268
Li3Ti2O5/Li9Ti4O10/order19	-6.43898
Li3Ti2O5/Li9Ti4O10/order26	-6.45358
Li3Ti2O5/Li9Ti4O10/order13	-6.46042
Li3Ti2O5/Li9Ti4O10/order11	-6.43506
Li3Ti2O5/Li9Ti4O10/order27	-6.43374
Li3Ti2O5/Li9Ti4O10/order5	-6.48127
Li3Ti2O5/Li9Ti4O10/order1	-6.44187
Li3Ti2O5/Li9Ti4O10/order3	-6.45029
Li3Ti2O5/Li9Ti4O10/order24	-6.43871
Li3Ti2O5/Li9Ti4O10/order25	-6.44883
Li3Ti2O5/Li9Ti4O10/order34	-6.44615
Li3Ti2O5/Li9Ti4O10/order22	-6.43892
Li3Ti2O5/Li9Ti4O10/order20	-6.44724
Li3Ti2O5/Li9Ti4O10/order30	-6.49277
Li3Ti2O5/Li4Ti2O5/order9	-6.72092
Li3Ti2O5/Li4Ti2O5/order10	-6.6859
Li3Ti2O5/Li4Ti2O5/order33	-6.68427
Li3Ti2O5/Li4Ti2O5/order36	-6.72147
Li3Ti2O5/Li4Ti2O5/order28	-6.65821
Li3Ti2O5/Li4Ti2O5/order0	-6.72073
Li3Ti2O5/Li4Ti2O5/order4	-6.72115
Li3Ti2O5/Li4Ti2O5/order35	-6.69893
Li3Ti2O5/Li4Ti2O5/order12	-6.7211
Li3Ti2O5/Li4Ti2O5/order31	-6.67491
Li3Ti2O5/Li4Ti2O5/order17	-6.66534
Li3Ti2O5/Li4Ti2O5/order23	-6.68959
Li3Ti2O5/Li4Ti2O5/order16	-6.7059
Li3Ti2O5/Li4Ti2O5/order2	-6.68623
Li3Ti2O5/Li4Ti2O5/order18	-6.72126
Li3Ti2O5/Li4Ti2O5/order6	-6.72117
Li3Ti2O5/Li4Ti2O5/order15	-6.68368
Li3Ti2O5/Li4Ti2O5/order8	-6.68459
Li3Ti2O5/Li4Ti2O5/order29	-6.70611
Li3Ti2O5/Li4Ti2O5/order14	-6.69001
Li3Ti2O5/Li4Ti2O5/order7	-6.69424
Li3Ti2O5/Li4Ti2O5/order21	-6.72123
Li3Ti2O5/Li4Ti2O5/order32	-6.69381
Li3Ti2O5/Li4Ti2O5/order37	-6.70532
Li3Ti2O5/Li4Ti2O5/order19	-6.69884
Li3Ti2O5/Li4Ti2O5/order26	-6.6962
Li3Ti2O5/Li4Ti2O5/order13	-6.66737
Li3Ti2O5/Li4Ti2O5/order11	-6.72104
Li3Ti2O5/Li4Ti2O5/order27	-6.72148
Li3Ti2O5/Li4Ti2O5/order5	-6.72111
Li3Ti2O5/Li4Ti2O5/order1	-6.6969
Li3Ti2O5/Li4Ti2O5/order3	-6.68627
Li3Ti2O5/Li4Ti2O5/order24	-6.67918
Li3Ti2O5/Li4Ti2O5/order25	-6.69626
Li3Ti2O5/Li4Ti2O5/order34	-6.70549
Li3Ti2O5/Li4Ti2O5/order22	-6.67147
Li3Ti2O5/Li4Ti2O5/order20	-6.69873
Li3Ti2O5/Li4Ti2O5/order30	-6.69439
Li3Ti2O5/Li13Ti8O20/order9	-7.11204
Li3Ti2O5/Li13Ti8O20/order10	-7.11093
Li3Ti2O5/Li13Ti8O20/order0	-7.11966
Li3Ti2O5/Li13Ti8O20/order4	-7.11909
Li3Ti2O5/Li13Ti8O20/order12	-7.11424
Li3Ti2O5/Li13Ti8O20/order17	-7.11731
Li3Ti2O5/Li13Ti8O20/order16	-7.11414
Li3Ti2O5/Li13Ti8O20/order2	-7.11726
Li3Ti2O5/Li13Ti8O20/order18	-7.1173
Li3Ti2O5/Li13Ti8O20/order6	-7.11863
Li3Ti2O5/Li13Ti8O20/order15	-7.11286
Li3Ti2O5/Li13Ti8O20/order8	-7.11144
Li3Ti2O5/Li13Ti8O20/order14	-7.11386
Li3Ti2O5/Li13Ti8O20/order7	-7.10882
Li3Ti2O5/Li13Ti8O20/order19	-7.11294
Li3Ti2O5/Li13Ti8O20/order13	-7.11413
Li3Ti2O5/Li13Ti8O20/order11	-7.11123
Li3Ti2O5/Li13Ti8O20/order5	-7.11805
Li3Ti2O5/Li13Ti8O20/order1	-7.11875
Li3Ti2O5/Li13Ti8O20/order3	-7.11975
Li3Ti2O5/Li13Ti8O20/order20	-7.10917
Li3Ti2O5/Li7Ti4O10/order9	-6.98134
Li3Ti2O5/Li7Ti4O10/order10	-6.98055
Li3Ti2O5/Li7Ti4O10/order0	-6.98006
Li3Ti2O5/Li7Ti4O10/order4	-6.9787
Li3Ti2O5/Li7Ti4O10/order12	-6.98469
Li3Ti2O5/Li7Ti4O10/order2	-6.981
Li3Ti2O5/Li7Ti4O10/order6	-6.98083
Li3Ti2O5/Li7Ti4O10/order8	-6.98264
Li3Ti2O5/Li7Ti4O10/order7	-6.98006
Li3Ti2O5/Li7Ti4O10/order13	-6.98112
Li3Ti2O5/Li7Ti4O10/order11	-6.97752
Li3Ti2O5/Li7Ti4O10/order5	-6.98181
Li3Ti2O5/Li7Ti4O10/order1	-6.9812
Li3Ti2O5/Li7Ti4O10/order3	-6.98369
Li3V2O5/str0	-6.62007
Li3V2O5/str3	-6.63364
Li3V2O5/str15	-6.58128
Li3V2O5/str14	-6.55547
Li3V2O5/str11	-6.62909
Li3V2O5/str2	-6.63136
Li3V2O5/str7	-6.63253
Li3V2O5/str6	-6.64144
Li3V2O5/str4	-6.63928
Li3V2O5/str1	-6.58421
Li3V2O5/str8	-6.62788
Li3V2O5/str12	-6.64389
Li3V2O5/str9	-6.61016
Li3V2O5/str13	-6.63073
Li3V2O5/str10	-6.62162
Li3V2O5/str5	-6.63562
Li3V2O5/Li31V16O40/order9	-6.29833
Li3V2O5/Li31V16O40/order10	-6.29267
Li3V2O5/Li31V16O40/order28	-6.28959
Li3V2O5/Li31V16O40/order0	-6.30053
Li3V2O5/Li31V16O40/order4	-6.29486
Li3V2O5/Li31V16O40/order12	-6.29364
Li3V2O5/Li31V16O40/order17	-6.30072
Li3V2O5/Li31V16O40/order23	-6.28996
Li3V2O5/Li31V16O40/order16	-6.30051
Li3V2O5/Li31V16O40/order2	-6.30104
Li3V2O5/Li31V16O40/order18	-6.28826
Li3V2O5/Li31V16O40/order6	-6.30054
Li3V2O5/Li31V16O40/order15	-6.30046
Li3V2O5/Li31V16O40/order8	-6.28943
Li3V2O5/Li31V16O40/order29	-6.29217
Li3V2O5/Li31V16O40/order14	-6.30062
Li3V2O5/Li31V16O40/order7	-6.2916
Li3V2O5/Li31V16O40/order21	-6.29269
Li3V2O5/Li31V16O40/order19	-6.28829
Li3V2O5/Li31V16O40/order26	-6.30105
Li3V2O5/Li31V16O40/order13	-6.29704
Li3V2O5/Li31V16O40/order11	-6.29547
Li3V2O5/Li31V16O40/order27	-6.29265
Li3V2O5/Li31V16O40/order5	-6.2959
Li3V2O5/Li31V16O40/order1	-6.29806
Li3V2O5/Li31V16O40/order3	-6.29084
Li3V2O5/Li31V16O40/order24	-6.29166
Li3V2O5/Li31V16O40/order25	-6.29805
Li3V2O5/Li31V16O40/order22	-6.28625
Li3V2O5/Li31V16O40/order20	-6.29357
Li3V2O5/Li13V8O20/order9	-6.53754
Li3V2O5/Li13V8O20/order10	-6.53211
Li3V2O5/Li13V8O20/order0	-6.53857
Li3V2O5/Li13V8O20/order4	-6.53938
Li3V2O5/Li13V8O20/order12	-6.53274
Li3V2O5/Li13V8O20/order17	-6.53171
Li3V2O5/Li13V8O20/order16	-6.52677
Li3V2O5/Li13V8O20/order2	-6.54021
Li3V2O5/Li13V8O20/order18	-6.52531
Li3V2O5/Li13V8O20/order6	-6.53662
Li3V2O5/Li13V8O20/order15	-6.53633
Li3V2O5/Li13V8O20/order8	-6.53715
Li3V2O5/Li13V8O20/order14	-6.5324
Li3V2O5/Li13V8O20/order7	-6.53976
Li3V2O5/Li13V8O20/order13	-6.5317
Li3V2O5/Li13V8O20/order11	-6.53343
Li3V2O5/Li13V8O20/order5	-6.53773
Li3V2O5/Li13V8O20/order1	-6.53246
Li3V2O5/Li13V8O20/order3	-6.53906
Li3V2O5/Li17V8O20/order9	-6.14848
Li3V2O5/Li17V8O20/order10	-6.15044
Li3V2O5/Li17V8O20/order0	-6.15631
Li3V2O5/Li17V8O20/order4	-6.15156
Li3V2O5/Li17V8O20/order12	-6.14691
Li3V2O5/Li17V8O20/order17	-6.1414
Li3V2O5/Li17V8O20/order23	-6.15676
Li3V2O5/Li17V8O20/order16	-6.14911
Li3V2O5/Li17V8O20/order2	-6.14942
Li3V2O5/Li17V8O20/order18	-6.14431
Li3V2O5/Li17V8O20/order6	-6.15231
Li3V2O5/Li17V8O20/order15	-6.14222
Li3V2O5/Li17V8O20/order8	-6.15726
Li3V2O5/Li17V8O20/order14	-6.15257
Li3V2O5/Li17V8O20/order7	-6.15558
Li3V2O5/Li17V8O20/order21	-6.13964
Li3V2O5/Li17V8O20/order19	-6.14415
Li3V2O5/Li17V8O20/order13	-6.1507
Li3V2O5/Li17V8O20/order11	-6.1578
Li3V2O5/Li17V8O20/order5	-6.1438
Li3V2O5/Li17V8O20/order1	-6.15656
Li3V2O5/Li17V8O20/order3	-6.15047
Li3V2O5/Li17V8O20/order24	-6.15536
Li3V2O5/Li17V8O20/order25	-6.14847
Li3V2O5/Li17V8O20/order22	-6.14071
Li3V2O5/Li17V8O20/order20	-6.15154
Li3V2O5/Li19V8O20/order9	-5.96942
Li3V2O5/Li19V8O20/order10	-5.95936
Li3V2O5/Li19V8O20/order28	-5.96612
Li3V2O5/Li19V8O20/order0	-5.96085
Li3V2O5/Li19V8O20/order4	-5.966
Li3V2O5/Li19V8O20/order12	-5.96987
Li3V2O5/Li19V8O20/order31	-5.95332
Li3V2O5/Li19V8O20/order17	-5.97325
Li3V2O5/Li19V8O20/order23	-5.97047
Li3V2O5/Li19V8O20/order16	-5.96834
Li3V2O5/Li19V8O20/order2	-5.97096
Li3V2O5/Li19V8O20/order18	-5.95838
Li3V2O5/Li19V8O20/order6	-5.97138
Li3V2O5/Li19V8O20/order15	-5.96061
Li3V2O5/Li19V8O20/order8	-5.96188
Li3V2O5/Li19V8O20/order29	-5.96312
Li3V2O5/Li19V8O20/order14	-5.97481
Li3V2O5/Li19V8O20/order7	-5.9722
Li3V2O5/Li19V8O20/order21	-5.96098
Li3V2O5/Li19V8O20/order19	-5.97208
Li3V2O5/Li19V8O20/order26	-5.96584
Li3V2O5/Li19V8O20/order13	-5.96626
Li3V2O5/Li19V8O20/order11	-5.97186
Li3V2O5/Li19V8O20/order27	-5.9748
Li3V2O5/Li19V8O20/order5	-5.94992
Li3V2O5/Li19V8O20/order1	-5.9836
Li3V2O5/Li19V8O20/order3	-5.96354
Li3V2O5/Li19V8O20/order24	-5.96711
Li3V2O5/Li19V8O20/order25	-5.97096
Li3V2O5/Li19V8O20/order22	-5.97164
Li3V2O5/Li19V8O20/order20	-5.95816
Li3V2O5/Li19V8O20/order30	-5.9613
Li3V2O5/Li9V4O10/order9	-6.04179
Li3V2O5/Li9V4O10/order10	-6.06225
Li3V2O5/Li9V4O10/order33	-6.05329
Li3V2O5/Li9V4O10/order36	-6.05281
Li3V2O5/Li9V4O10/order28	-6.05201
Li3V2O5/Li9V4O10/order0	-6.05991
Li3V2O5/Li9V4O10/order4	-6.06266
Li3V2O5/Li9V4O10/order35	-6.0497
Li3V2O5/Li9V4O10/order12	-6.05847
Li3V2O5/Li9V4O10/order31	-6.06032
Li3V2O5/Li9V4O10/order17	-6.05713
Li3V2O5/Li9V4O10/order23	-6.05527
Li3V2O5/Li9V4O10/order16	-6.05287
Li3V2O5/Li9V4O10/order2	-6.06651
Li3V2O5/Li9V4O10/order18	-6.05775
Li3V2O5/Li9V4O10/order6	-6.06161
Li3V2O5/Li9V4O10/order15	-6.06131
Li3V2O5/Li9V4O10/order8	-6.04665
Li3V2O5/Li9V4O10/order29	-6.06449
Li3V2O5/Li9V4O10/order14	-6.05217
Li3V2O5/Li9V4O10/order7	-6.05592
Li3V2O5/Li9V4O10/order21	-6.05079
Li3V2O5/Li9V4O10/order32	-6.05473
Li3V2O5/Li9V4O10/order37	-6.06046
Li3V2O5/Li9V4O10/order19	-6.0465
Li3V2O5/Li9V4O10/order26	-6.06179
Li3V2O5/Li9V4O10/order13	-6.06214
Li3V2O5/Li9V4O10/order11	-6.06352
Li3V2O5/Li9V4O10/order27	-6.04983
Li3V2O5/Li9V4O10/order5	-6.05299
Li3V2O5/Li9V4O10/order1	-6.05657
Li3V2O5/Li9V4O10/order3	-6.05257
Li3V2O5/Li9V4O10/order24	-6.05817
Li3V2O5/Li9V4O10/order25	-6.06218
Li3V2O5/Li9V4O10/order34	-6.06456
Li3V2O5/Li9V4O10/order22	-6.06091
Li3V2O5/Li9V4O10/order20	-6.0692
Li3V2O5/Li9V4O10/order30	-6.04866
Li3V2O5/Li5V2O5/order9	-5.88069
Li3V2O5/Li5V2O5/order10	-5.87043
Li3V2O5/Li5V2O5/order33	-5.88261
Li3V2O5/Li5V2O5/order36	-5.88196
Li3V2O5/Li5V2O5/order28	-5.90329
Li3V2O5/Li5V2O5/order0	-5.87114
Li3V2O5/Li5V2O5/order4	-5.87479
Li3V2O5/Li5V2O5/order35	-5.89121
Li3V2O5/Li5V2O5/order38	-5.91328
Li3V2O5/Li5V2O5/order12	-5.86254
Li3V2O5/Li5V2O5/order31	-5.89097
Li3V2O5/Li5V2O5/order17	-5.8914
Li3V2O5/Li5V2O5/order44	-5.92051
Li3V2O5/Li5V2O5/order23	-5.91185
Li3V2O5/Li5V2O5/order45	-5.91522
Li3V2O5/Li5V2O5/order40	-5.8723
Li3V2O5/Li5V2O5/order16	-5.87217
Li3V2O5/Li5V2O5/order49	-5.85958
Li3V2O5/Li5V2O5/order2	-5.90611
Li3V2O5/Li5V2O5/order18	-5.87923
Li3V2O5/Li5V2O5/order6	-5.87373
Li3V2O5/Li5V2O5/order15	-5.8703
Li3V2O5/Li5V2O5/order8	-5.88246
Li3V2O5/Li5V2O5/order29	-5.87405
Li3V2O5/Li5V2O5/order14	-5.90417
Li3V2O5/Li5V2O5/order7	-5.89628
Li3V2O5/Li5V2O5/order21	-5.86914
Li3V2O5/Li5V2O5/order32	-5.87147
Li3V2O5/Li5V2O5/order37	-5.86384
Li3V2O5/Li5V2O5/order46	-5.90714
Li3V2O5/Li5V2O5/order42	-5.89472
Li3V2O5/Li5V2O5/order19	-5.87426
Li3V2O5/Li5V2O5/order26	-5.8582
Li3V2O5/Li5V2O5/order13	-5.88896
Li3V2O5/Li5V2O5/order11	-5.89137
Li3V2O5/Li5V2O5/order27	-5.891
Li3V2O5/Li5V2O5/order5	-5.88206
Li3V2O5/Li5V2O5/order1	-5.85565
Li3V2O5/Li5V2O5/order39	-5.88092
Li3V2O5/Li5V2O5/order41	-5.93475
Li3V2O5/Li5V2O5/order3	-5.89159
Li3V2O5/Li5V2O5/order43	-5.89135
Li3V2O5/Li5V2O5/order48	-5.89155
Li3V2O5/Li5V2O5/order24	-5.88215
Li3V2O5/Li5V2O5/order25	-5.84673
Li3V2O5/Li5V2O5/order34	-5.86187
Li3V2O5/Li5V2O5/order47	-5.91529
Li3V2O5/Li5V2O5/order22	-5.89157
Li3V2O5/Li5V2O5/order20	-5.88218
Li3V2O5/Li5V2O5/order30	-5.86057
Li3V2O5/Li15V8O20/order9	-6.34429
Li3V2O5/Li15V8O20/order10	-6.34001
Li3V2O5/Li15V8O20/order28	-6.33601
Li3V2O5/Li15V8O20/order0	-6.34664
Li3V2O5/Li15V8O20/order4	-6.34694
Li3V2O5/Li15V8O20/order12	-6.34566
Li3V2O5/Li15V8O20/order31	-6.3436
Li3V2O5/Li15V8O20/order17	-6.34432
Li3V2O5/Li15V8O20/order23	-6.33364
Li3V2O5/Li15V8O20/order16	-6.33345
Li3V2O5/Li15V8O20/order2	-6.34632
Li3V2O5/Li15V8O20/order18	-6.34005
Li3V2O5/Li15V8O20/order6	-6.34477
Li3V2O5/Li15V8O20/order15	-6.34563
Li3V2O5/Li15V8O20/order8	-6.34691
Li3V2O5/Li15V8O20/order29	-6.33416
Li3V2O5/Li15V8O20/order14	-6.34928
Li3V2O5/Li15V8O20/order7	-6.34921
Li3V2O5/Li15V8O20/order21	-6.34598
Li3V2O5/Li15V8O20/order19	-6.34494
Li3V2O5/Li15V8O20/order26	-6.34422
Li3V2O5/Li15V8O20/order13	-6.34465
Li3V2O5/Li15V8O20/order11	-6.33677
Li3V2O5/Li15V8O20/order27	-6.33748
Li3V2O5/Li15V8O20/order5	-6.346
Li3V2O5/Li15V8O20/order1	-6.34574
Li3V2O5/Li15V8O20/order3	-6.34533
Li3V2O5/Li15V8O20/order24	-6.3377
Li3V2O5/Li15V8O20/order25	-6.33744
Li3V2O5/Li15V8O20/order22	-6.33436
Li3V2O5/Li15V8O20/order20	-6.33987
Li3V2O5/Li15V8O20/order30	-6.34214
Li3V2O5/Li4V2O5/order9	-6.23235
Li3V2O5/Li4V2O5/order10	-6.24932
Li3V2O5/Li4V2O5/order33	-6.23507
Li3V2O5/Li4V2O5/order36	-6.25725
Li3V2O5/Li4V2O5/order28	-6.23389
Li3V2O5/Li4V2O5/order0	-6.25728
Li3V2O5/Li4V2O5/order4	-6.2495
Li3V2O5/Li4V2O5/order35	-6.24517
Li3V2O5/Li4V2O5/order38	-6.24181
Li3V2O5/Li4V2O5/order12	-6.24321
Li3V2O5/Li4V2O5/order31	-6.25281
Li3V2O5/Li4V2O5/order17	-6.25163
Li3V2O5/Li4V2O5/order44	-6.25025
Li3V2O5/Li4V2O5/order23	-6.24381
Li3V2O5/Li4V2O5/order45	-6.23342
Li3V2O5/Li4V2O5/order40	-6.25157
Li3V2O5/Li4V2O5/order16	-6.23894
Li3V2O5/Li4V2O5/order49	-6.25627
Li3V2O5/Li4V2O5/order2	-6.2571
Li3V2O5/Li4V2O5/order18	-6.23349
Li3V2O5/Li4V2O5/order6	-6.23032
Li3V2O5/Li4V2O5/order15	-6.24165
Li3V2O5/Li4V2O5/order8	-6.25258
Li3V2O5/Li4V2O5/order29	-6.25574
Li3V2O5/Li4V2O5/order14	-6.22394
Li3V2O5/Li4V2O5/order7	-6.25485
Li3V2O5/Li4V2O5/order21	-6.2372
Li3V2O5/Li4V2O5/order32	-6.25497
Li3V2O5/Li4V2O5/order37	-6.24341
Li3V2O5/Li4V2O5/order46	-6.2421
Li3V2O5/Li4V2O5/order42	-6.25267
Li3V2O5/Li4V2O5/order19	-6.23482
Li3V2O5/Li4V2O5/order26	-6.2489
Li3V2O5/Li4V2O5/order13	-6.25594
Li3V2O5/Li4V2O5/order11	-6.25595
Li3V2O5/Li4V2O5/order27	-6.25725
Li3V2O5/Li4V2O5/order5	-6.23298
Li3V2O5/Li4V2O5/order1	-6.24488
Li3V2O5/Li4V2O5/order39	-6.25659
Li3V2O5/Li4V2O5/order41	-6.25719
Li3V2O5/Li4V2O5/order3	-6.25103
Li3V2O5/Li4V2O5/order43	-6.25482
Li3V2O5/Li4V2O5/order48	-6.25091
Li3V2O5/Li4V2O5/order24	-6.25579
Li3V2O5/Li4V2O5/order25	-6.23228
Li3V2O5/Li4V2O5/order34	-6.25663
Li3V2O5/Li4V2O5/order47	-6.24292
Li3V2O5/Li4V2O5/order22	-6.2405
Li3V2O5/Li4V2O5/order20	-6.2487
Li3V2O5/Li4V2O5/order30	-6.25545
Li3V2O5/Li7V4O10/order9	-6.44037
Li3V2O5/Li7V4O10/order10	-6.43793
Li3V2O5/Li7V4O10/order0	-6.44109
Li3V2O5/Li7V4O10/order4	-6.43605
Li3V2O5/Li7V4O10/order12	-6.436
Li3V2O5/Li7V4O10/order17	-6.43855
Li3V2O5/Li7V4O10/order16	-6.43849
Li3V2O5/Li7V4O10/order2	-6.44434
Li3V2O5/Li7V4O10/order18	-6.43769
Li3V2O5/Li7V4O10/order6	-6.44283
Li3V2O5/Li7V4O10/order15	-6.43814
Li3V2O5/Li7V4O10/order8	-6.44199
Li3V2O5/Li7V4O10/order14	-6.43934
Li3V2O5/Li7V4O10/order7	-6.44382
Li3V2O5/Li7V4O10/order19	-6.4389
Li3V2O5/Li7V4O10/order13	-6.44037
Li3V2O5/Li7V4O10/order11	-6.44017
Li3V2O5/Li7V4O10/order5	-6.43933
Li3V2O5/Li7V4O10/order1	-6.44233
Li3V2O5/Li7V4O10/order3	-6.4403
Li3V2O5/Li7V4O10/order20	-6.43811
Li3V2O5/Li27V16O40/order9	-6.48818
Li3V2O5/Li27V16O40/order10	-6.4864
Li3V2O5/Li27V16O40/order0	-6.49026
Li3V2O5/Li27V16O40/order4	-6.48737
Li3V2O5/Li27V16O40/order12	-6.48735
Li3V2O5/Li27V16O40/order2	-6.48806
Li3V2O5/Li27V16O40/order6	-6.48807
Li3V2O5/Li27V16O40/order8	-6.48956
Li3V2O5/Li27V16O40/order7	-6.48995
Li3V2O5/Li27V16O40/order13	-6.48671
Li3V2O5/Li27V16O40/order11	-6.48957
Li3V2O5/Li27V16O40/order5	-6.48702
Li3V2O5/Li27V16O40/order1	-6.49058
Li3V2O5/Li27V16O40/order3	-6.4873
Li3V2O5/Li25V16O40/order9	-6.59017
Li3V2O5/Li25V16O40/order10	-6.59015
Li3V2O5/Li25V16O40/order0	-6.59166
Li3V2O5/Li25V16O40/order4	-6.58069
Li3V2O5/Li25V16O40/order12	-6.58895
Li3V2O5/Li25V16O40/order2	-6.58247
Li3V2O5/Li25V16O40/order6	-6.58265
Li3V2O5/Li25V16O40/order8	-6.5853
Li3V2O5/Li25V16O40/order7	-6.58328
Li3V2O5/Li25V16O40/order11	-6.59002
Li3V2O5/Li25V16O40/order5	-6.58478
Li3V2O5/Li25V16O40/order1	-6.59014
Li3V2O5/Li25V16O40/order3	-6.58448
Li3V2O5/Li29V16O40/order9	-6.38957
Li3V2O5/Li29V16O40/order10	-6.39172
Li3V2O5/Li29V16O40/order0	-6.39312
Li3V2O5/Li29V16O40/order4	-6.39143
Li3V2O5/Li29V16O40/order12	-6.39005
Li3V2O5/Li29V16O40/order2	-6.39294
Li3V2O5/Li29V16O40/order6	-6.39256
Li3V2O5/Li29V16O40/order8	-6.39325
Li3V2O5/Li29V16O40/order7	-6.39311
Li3V2O5/Li29V16O40/order11	-6.39123
Li3V2O5/Li29V16O40/order5	-6.38988
Li3V2O5/Li29V16O40/order1	-6.3926
Li3V2O5/Li29V16O40/order3	-6.39653
Li3Cr2O5/str0	-6.45592
Li3Cr2O5/str3	-6.46999
Li3Cr2O5/str15	-6.42588
Li3Cr2O5/str14	-6.42112
Li3Cr2O5/str11	-6.46235
Li3Cr2O5/str2	-6.47559
Li3Cr2O5/str7	-6.47815
Li3Cr2O5/str6	-6.49173
Li3Cr2O5/str4	-6.49563
Li3Cr2O5/str1	-6.47637
Li3Cr2O5/str8	-6.48214
Li3Cr2O5/str12	-6.48566
Li3Cr2O5/str9	-6.45882
Li3Cr2O5/str13	-6.46488
Li3Cr2O5/str10	-6.51253
Li3Cr2O5/str5	-6.49448
Li3Cr2O5/Li4Cr2O5/order9	-6.23587
Li3Cr2O5/Li4Cr2O5/order10	-6.24167
Li3Cr2O5/Li4Cr2O5/order28	-6.23678
Li3Cr2O5/Li4Cr2O5/order0	-6.2321
Li3Cr2O5/Li4Cr2O5/order4	-6.24276
Li3Cr2O5/Li4Cr2O5/order12	-6.25516
Li3Cr2O5/Li4Cr2O5/order17	-6.23637
Li3Cr2O5/Li4Cr2O5/order23	-6.22318
Li3Cr2O5/Li4Cr2O5/order16	-6.24241
Li3Cr2O5/Li4Cr2O5/order2	-6.24187
Li3Cr2O5/Li4Cr2O5/order18	-6.23549
Li3Cr2O5/Li4Cr2O5/order6	-6.23949
Li3Cr2O5/Li4Cr2O5/order15	-6.23149
Li3Cr2O5/Li4Cr2O5/order8	-6.23634
Li3Cr2O5/Li4Cr2O5/order29	-6.25778
Li3Cr2O5/Li4Cr2O5/order14	-6.23175
Li3Cr2O5/Li4Cr2O5/order7	-6.23714
Li3Cr2O5/Li4Cr2O5/order21	-6.24235
Li3Cr2O5/Li4Cr2O5/order19	-6.23673
Li3Cr2O5/Li4Cr2O5/order26	-6.2254
Li3Cr2O5/Li4Cr2O5/order13	-6.21846
Li3Cr2O5/Li4Cr2O5/order11	-6.22748
Li3Cr2O5/Li4Cr2O5/order27	-6.24499
Li3Cr2O5/Li4Cr2O5/order5	-6.24478
Li3Cr2O5/Li4Cr2O5/order1	-6.24114
Li3Cr2O5/Li4Cr2O5/order3	-6.24192
Li3Cr2O5/Li4Cr2O5/order24	-6.23649
Li3Cr2O5/Li4Cr2O5/order25	-6.24269
Li3Cr2O5/Li4Cr2O5/order22	-6.24235
Li3Cr2O5/Li4Cr2O5/order20	-6.23256
Li3Cr2O5/Li29Cr16O40/order0	-6.33883
Li3Cr2O5/Li29Cr16O40/order4	-6.33731
Li3Cr2O5/Li29Cr16O40/order2	-6.33336
Li3Cr2O5/Li29Cr16O40/order6	-6.33395
Li3Cr2O5/Li29Cr16O40/order5	-6.32711
Li3Cr2O5/Li29Cr16O40/order1	-6.33965
Li3Cr2O5/Li29Cr16O40/order3	-6.33664
Li3Cr2O5/Li27Cr16O40/order0	-6.411
Li3Cr2O5/Li27Cr16O40/order4	-6.40809
Li3Cr2O5/Li27Cr16O40/order2	-6.4043
Li3Cr2O5/Li27Cr16O40/order6	-6.4059
Li3Cr2O5/Li27Cr16O40/order5	-6.39815
Li3Cr2O5/Li27Cr16O40/order1	-6.41045
Li3Cr2O5/Li27Cr16O40/order3	-6.40656
Li3Cr2O5/Li25Cr16O40/order0	-6.47752
Li3Cr2O5/Li25Cr16O40/order4	-6.47085
Li3Cr2O5/Li25Cr16O40/order2	-6.47094
Li3Cr2O5/Li25Cr16O40/order6	-6.47713
Li3Cr2O5/Li25Cr16O40/order5	-6.47621
Li3Cr2O5/Li25Cr16O40/order1	-6.47089
Li3Cr2O5/Li25Cr16O40/order3	-6.47165
Li3Cr2O5/Li7Cr4O10/order9	-6.37037
Li3Cr2O5/Li7Cr4O10/order10	-6.36735
Li3Cr2O5/Li7Cr4O10/order0	-6.38039
Li3Cr2O5/Li7Cr4O10/order4	-6.37356
Li3Cr2O5/Li7Cr4O10/order12	-6.35536
Li3Cr2O5/Li7Cr4O10/order2	-6.36517
Li3Cr2O5/Li7Cr4O10/order6	-6.37234
Li3Cr2O5/Li7Cr4O10/order8	-6.36873
Li3Cr2O5/Li7Cr4O10/order7	-6.36906
Li3Cr2O5/Li7Cr4O10/order13	-6.36869
Li3Cr2O5/Li7Cr4O10/order11	-6.37385
Li3Cr2O5/Li7Cr4O10/order5	-6.36825
Li3Cr2O5/Li7Cr4O10/order1	-6.37889
Li3Cr2O5/Li7Cr4O10/order3	-6.37501
Li3Cr2O5/Li9Cr4O10/order9	-6.0718
Li3Cr2O5/Li9Cr4O10/order10	-6.0773
Li3Cr2O5/Li9Cr4O10/order33	-6.06048
Li3Cr2O5/Li9Cr4O10/order36	-6.07881
Li3Cr2O5/Li9Cr4O10/order28	-6.06006
Li3Cr2O5/Li9Cr4O10/order0	-6.02268
Li3Cr2O5/Li9Cr4O10/order4	-6.08427
Li3Cr2O5/Li9Cr4O10/order35	-6.07389
Li3Cr2O5/Li9Cr4O10/order12	-6.07494
Li3Cr2O5/Li9Cr4O10/order31	-6.08199
Li3Cr2O5/Li9Cr4O10/order17	-6.07888
Li3Cr2O5/Li9Cr4O10/order23	-6.01056
Li3Cr2O5/Li9Cr4O10/order16	-6.07188
Li3Cr2O5/Li9Cr4O10/order2	-6.07026
Li3Cr2O5/Li9Cr4O10/order18	-6.06415
Li3Cr2O5/Li9Cr4O10/order6	-6.07967
Li3Cr2O5/Li9Cr4O10/order15	-6.07769
Li3Cr2O5/Li9Cr4O10/order8	-6.05128
Li3Cr2O5/Li9Cr4O10/order29	-6.07192
Li3Cr2O5/Li9Cr4O10/order14	-6.07324
Li3Cr2O5/Li9Cr4O10/order7	-5.98845
Li3Cr2O5/Li9Cr4O10/order21	-6.02783
Li3Cr2O5/Li9Cr4O10/order32	-6.06484
Li3Cr2O5/Li9Cr4O10/order37	-6.0718
Li3Cr2O5/Li9Cr4O10/order19	-6.08519
Li3Cr2O5/Li9Cr4O10/order26	-6.07073
Li3Cr2O5/Li9Cr4O10/order13	-6.03809
Li3Cr2O5/Li9Cr4O10/order11	-6.06093
Li3Cr2O5/Li9Cr4O10/order27	-6.08547
Li3Cr2O5/Li9Cr4O10/order5	-6.03981
Li3Cr2O5/Li9Cr4O10/order1	-6.02638
Li3Cr2O5/Li9Cr4O10/order3	-6.08215
Li3Cr2O5/Li9Cr4O10/order24	-6.03186
Li3Cr2O5/Li9Cr4O10/order25	-6.08625
Li3Cr2O5/Li9Cr4O10/order34	-6.05962
Li3Cr2O5/Li9Cr4O10/order22	-6.07527
Li3Cr2O5/Li9Cr4O10/order20	-6.08343
Li3Cr2O5/Li9Cr4O10/order30	-6.07194
Li3Cr2O5/Li13Cr8O20/order9	-6.43772
Li3Cr2O5/Li13Cr8O20/order10	-6.43964
Li3Cr2O5/Li13Cr8O20/order0	-6.44493
Li3Cr2O5/Li13Cr8O20/order4	-6.44495
Li3Cr2O5/Li13Cr8O20/order12	-6.43466
Li3Cr2O5/Li13Cr8O20/order2	-6.44275
Li3Cr2O5/Li13Cr8O20/order6	-6.43702
Li3Cr2O5/Li13Cr8O20/order15	-6.43367
Li3Cr2O5/Li13Cr8O20/order8	-6.43887
Li3Cr2O5/Li13Cr8O20/order14	-6.4361
Li3Cr2O5/Li13Cr8O20/order7	-6.43837
Li3Cr2O5/Li13Cr8O20/order13	-6.43866
Li3Cr2O5/Li13Cr8O20/order11	-6.43845
Li3Cr2O5/Li13Cr8O20/order5	-6.438
Li3Cr2O5/Li13Cr8O20/order1	-6.44167
Li3Cr2O5/Li13Cr8O20/order3	-6.44354
Li3Cr2O5/Li17Cr8O20/order9	-6.11732
Li3Cr2O5/Li17Cr8O20/order10	-6.157
Li3Cr2O5/Li17Cr8O20/order0	-6.11537
Li3Cr2O5/Li17Cr8O20/order4	-6.15404
Li3Cr2O5/Li17Cr8O20/order12	-6.12494
Li3Cr2O5/Li17Cr8O20/order17	-6.16715
Li3Cr2O5/Li17Cr8O20/order23	-6.17541
Li3Cr2O5/Li17Cr8O20/order16	-6.11898
Li3Cr2O5/Li17Cr8O20/order2	-6.13526
Li3Cr2O5/Li17Cr8O20/order18	-6.13756
Li3Cr2O5/Li17Cr8O20/order6	-6.12606
Li3Cr2O5/Li17Cr8O20/order15	-6.16708
Li3Cr2O5/Li17Cr8O20/order8	-6.11591
Li3Cr2O5/Li17Cr8O20/order14	-6.11982
Li3Cr2O5/Li17Cr8O20/order7	-6.11889
Li3Cr2O5/Li17Cr8O20/order21	-6.16219
Li3Cr2O5/Li17Cr8O20/order19	-6.11908
Li3Cr2O5/Li17Cr8O20/order13	-6.11443
Li3Cr2O5/Li17Cr8O20/order11	-6.12633
Li3Cr2O5/Li17Cr8O20/order5	-6.13315
Li3Cr2O5/Li17Cr8O20/order1	-6.17078
Li3Cr2O5/Li17Cr8O20/order3	-6.14213
Li3Cr2O5/Li17Cr8O20/order24	-6.14161
Li3Cr2O5/Li17Cr8O20/order25	-6.12225
Li3Cr2O5/Li17Cr8O20/order22	-6.12094
Li3Cr2O5/Li17Cr8O20/order20	-6.16898
Li3Cr2O5/Li15Cr8O20/order9	-6.3039
Li3Cr2O5/Li15Cr8O20/order10	-6.30489
Li3Cr2O5/Li15Cr8O20/order28	-6.29865
Li3Cr2O5/Li15Cr8O20/order0	-6.3039
Li3Cr2O5/Li15Cr8O20/order4	-6.30234
Li3Cr2O5/Li15Cr8O20/order12	-6.30535
Li3Cr2O5/Li15Cr8O20/order17	-6.30049
Li3Cr2O5/Li15Cr8O20/order23	-6.29406
Li3Cr2O5/Li15Cr8O20/order16	-6.29818
Li3Cr2O5/Li15Cr8O20/order2	-6.30221
Li3Cr2O5/Li15Cr8O20/order18	-6.30514
Li3Cr2O5/Li15Cr8O20/order6	-6.29409
Li3Cr2O5/Li15Cr8O20/order15	-6.30216
Li3Cr2O5/Li15Cr8O20/order8	-6.3041
Li3Cr2O5/Li15Cr8O20/order14	-6.30396
Li3Cr2O5/Li15Cr8O20/order7	-6.30391
Li3Cr2O5/Li15Cr8O20/order21	-6.29866
Li3Cr2O5/Li15Cr8O20/order19	-6.30262
Li3Cr2O5/Li15Cr8O20/order26	-6.30279
Li3Cr2O5/Li15Cr8O20/order13	-6.305
Li3Cr2O5/Li15Cr8O20/order11	-6.30364
Li3Cr2O5/Li15Cr8O20/order27	-6.30429
Li3Cr2O5/Li15Cr8O20/order5	-6.30049
Li3Cr2O5/Li15Cr8O20/order1	-6.30279
Li3Cr2O5/Li15Cr8O20/order3	-6.30253
Li3Cr2O5/Li15Cr8O20/order24	-6.30332
Li3Cr2O5/Li15Cr8O20/order25	-6.30423
Li3Cr2O5/Li15Cr8O20/order22	-6.30659
Li3Cr2O5/Li15Cr8O20/order20	-6.30315
Li3Cr2O5/Li5Cr2O5/order9	-5.86617
Li3Cr2O5/Li5Cr2O5/order10	-5.92792
Li3Cr2O5/Li5Cr2O5/order33	-5.92221
Li3Cr2O5/Li5Cr2O5/order36	-5.91209
Li3Cr2O5/Li5Cr2O5/order28	-5.92644
Li3Cr2O5/Li5Cr2O5/order0	-5.92292
Li3Cr2O5/Li5Cr2O5/order4	-5.92032
Li3Cr2O5/Li5Cr2O5/order35	-5.87086
Li3Cr2O5/Li5Cr2O5/order38	-5.90814
Li3Cr2O5/Li5Cr2O5/order12	-5.91881
Li3Cr2O5/Li5Cr2O5/order31	-5.92385
Li3Cr2O5/Li5Cr2O5/order17	-5.85423
Li3Cr2O5/Li5Cr2O5/order23	-5.92866
Li3Cr2O5/Li5Cr2O5/order40	-5.9319
Li3Cr2O5/Li5Cr2O5/order16	-5.90403
Li3Cr2O5/Li5Cr2O5/order2	-5.92725
Li3Cr2O5/Li5Cr2O5/order18	-5.87602
Li3Cr2O5/Li5Cr2O5/order6	-5.85636
Li3Cr2O5/Li5Cr2O5/order15	-5.91424
Li3Cr2O5/Li5Cr2O5/order8	-5.86207
Li3Cr2O5/Li5Cr2O5/order29	-5.88274
Li3Cr2O5/Li5Cr2O5/order14	-5.90816
Li3Cr2O5/Li5Cr2O5/order7	-5.93131
Li3Cr2O5/Li5Cr2O5/order21	-5.82511
Li3Cr2O5/Li5Cr2O5/order32	-5.91841
Li3Cr2O5/Li5Cr2O5/order37	-5.89862
Li3Cr2O5/Li5Cr2O5/order42	-5.93455
Li3Cr2O5/Li5Cr2O5/order19	-5.93068
Li3Cr2O5/Li5Cr2O5/order26	-5.9138
Li3Cr2O5/Li5Cr2O5/order13	-5.90372
Li3Cr2O5/Li5Cr2O5/order11	-5.92
Li3Cr2O5/Li5Cr2O5/order27	-5.86122
Li3Cr2O5/Li5Cr2O5/order5	-5.91255
Li3Cr2O5/Li5Cr2O5/order1	-5.9191
Li3Cr2O5/Li5Cr2O5/order39	-5.89811
Li3Cr2O5/Li5Cr2O5/order41	-5.8612
Li3Cr2O5/Li5Cr2O5/order3	-5.90341
Li3Cr2O5/Li5Cr2O5/order43	-5.93291
Li3Cr2O5/Li5Cr2O5/order24	-5.82998
Li3Cr2O5/Li5Cr2O5/order25	-5.85467
Li3Cr2O5/Li5Cr2O5/order34	-5.90745
Li3Cr2O5/Li5Cr2O5/order22	-5.91935
Li3Cr2O5/Li5Cr2O5/order20	-5.90085
Li3Cr2O5/Li5Cr2O5/order30	-5.8691
Li3Cr2O5/Li19Cr8O20/order9	-5.98937
Li3Cr2O5/Li19Cr8O20/order10	-5.99173
Li3Cr2O5/Li19Cr8O20/order28	-5.99265
Li3Cr2O5/Li19Cr8O20/order0	-5.99109
Li3Cr2O5/Li19Cr8O20/order4	-5.99764
Li3Cr2O5/Li19Cr8O20/order12	-5.94904
Li3Cr2O5/Li19Cr8O20/order31	-6.00042
Li3Cr2O5/Li19Cr8O20/order17	-5.99669
Li3Cr2O5/Li19Cr8O20/order23	-5.97747
Li3Cr2O5/Li19Cr8O20/order16	-5.99692
Li3Cr2O5/Li19Cr8O20/order2	-5.99456
Li3Cr2O5/Li19Cr8O20/order18	-5.98273
Li3Cr2O5/Li19Cr8O20/order6	-5.97699
Li3Cr2O5/Li19Cr8O20/order15	-5.9895
Li3Cr2O5/Li19Cr8O20/order8	-5.97088
Li3Cr2O5/Li19Cr8O20/order29	-5.99515
Li3Cr2O5/Li19Cr8O20/order14	-5.99465
Li3Cr2O5/Li19Cr8O20/order7	-5.99594
Li3Cr2O5/Li19Cr8O20/order21	-6.00575
Li3Cr2O5/Li19Cr8O20/order19	-5.99361
Li3Cr2O5/Li19Cr8O20/order26	-5.98807
Li3Cr2O5/Li19Cr8O20/order13	-5.9969
Li3Cr2O5/Li19Cr8O20/order11	-5.99151
Li3Cr2O5/Li19Cr8O20/order27	-5.99636
Li3Cr2O5/Li19Cr8O20/order5	-5.99539
Li3Cr2O5/Li19Cr8O20/order1	-5.99709
Li3Cr2O5/Li19Cr8O20/order3	-5.98817
Li3Cr2O5/Li19Cr8O20/order24	-5.99113
Li3Cr2O5/Li19Cr8O20/order25	-5.98592
Li3Cr2O5/Li19Cr8O20/order22	-5.9972
Li3Cr2O5/Li19Cr8O20/order20	-5.96956
Li3Cr2O5/Li19Cr8O20/order30	-5.99781
Li3Cr2O5/Li31Cr16O40/order9	-6.26998
Li3Cr2O5/Li31Cr16O40/order10	-6.28596
Li3Cr2O5/Li31Cr16O40/order28	-6.27072
Li3Cr2O5/Li31Cr16O40/order0	-6.27442
Li3Cr2O5/Li31Cr16O40/order4	-6.26518
Li3Cr2O5/Li31Cr16O40/order12	-6.27063
Li3Cr2O5/Li31Cr16O40/order17	-6.26647
Li3Cr2O5/Li31Cr16O40/order23	-6.26674
Li3Cr2O5/Li31Cr16O40/order16	-6.26479
Li3Cr2O5/Li31Cr16O40/order2	-6.27361
Li3Cr2O5/Li31Cr16O40/order18	-6.26793
Li3Cr2O5/Li31Cr16O40/order6	-6.26996
Li3Cr2O5/Li31Cr16O40/order15	-6.26972
Li3Cr2O5/Li31Cr16O40/order8	-6.27035
Li3Cr2O5/Li31Cr16O40/order14	-6.27053
Li3Cr2O5/Li31Cr16O40/order7	-6.27303
Li3Cr2O5/Li31Cr16O40/order21	-6.26715
Li3Cr2O5/Li31Cr16O40/order19	-6.26931
Li3Cr2O5/Li31Cr16O40/order26	-6.27535
Li3Cr2O5/Li31Cr16O40/order13	-6.27053
Li3Cr2O5/Li31Cr16O40/order11	-6.26945
Li3Cr2O5/Li31Cr16O40/order27	-6.26916
Li3Cr2O5/Li31Cr16O40/order5	-6.27007
Li3Cr2O5/Li31Cr16O40/order1	-6.26713
Li3Cr2O5/Li31Cr16O40/order3	-6.26943
Li3Cr2O5/Li31Cr16O40/order24	-6.29169
Li3Cr2O5/Li31Cr16O40/order25	-6.26829
Li3Cr2O5/Li31Cr16O40/order22	-6.28931
Li3Cr2O5/Li31Cr16O40/order20	-6.26836
Li3Mn2O5/str0	-6.30456
Li3Mn2O5/str3	-6.29173
Li3Mn2O5/str15	-6.27203
Li3Mn2O5/str14	-6.25567
Li3Mn2O5/str11	-6.29813
Li3Mn2O5/str2	-6.32231
Li3Mn2O5/str7	-6.3244
Li3Mn2O5/str6	-6.32551
Li3Mn2O5/str4	-6.35123
Li3Mn2O5/str1	-6.33112
Li3Mn2O5/str8	-6.32242
Li3Mn2O5/str12	-6.31351
Li3Mn2O5/str9	-6.30228
Li3Mn2O5/str13	-6.30371
Li3Mn2O5/str10	-6.34033
Li3Mn2O5/str5	-6.34584
Li3Mn2O5/Li29Mn16O40/order0	-6.16499
Li3Mn2O5/Li29Mn16O40/order4	-6.15455
Li3Mn2O5/Li29Mn16O40/order2	-6.15991
Li3Mn2O5/Li29Mn16O40/order6	-6.15602
Li3Mn2O5/Li29Mn16O40/order5	-6.16027
Li3Mn2O5/Li29Mn16O40/order1	-6.1597
Li3Mn2O5/Li29Mn16O40/order3	-6.15846
Li3Mn2O5/Li7Mn4O10/order9	-6.19204
Li3Mn2O5/Li7Mn4O10/order10	-6.19475
Li3Mn2O5/Li7Mn4O10/order0	-6.19216
Li3Mn2O5/Li7Mn4O10/order4	-6.19265
Li3Mn2O5/Li7Mn4O10/order12	-6.19416
Li3Mn2O5/Li7Mn4O10/order2	-6.19666
Li3Mn2O5/Li7Mn4O10/order6	-6.19178
Li3Mn2O5/Li7Mn4O10/order8	-6.19568
Li3Mn2O5/Li7Mn4O10/order7	-6.19143
Li3Mn2O5/Li7Mn4O10/order13	-6.19143
Li3Mn2O5/Li7Mn4O10/order11	-6.1879
Li3Mn2O5/Li7Mn4O10/order5	-6.19195
Li3Mn2O5/Li7Mn4O10/order1	-6.19235
Li3Mn2O5/Li7Mn4O10/order3	-6.1998
Li3Mn2O5/Li13Mn8O20/order9	-6.26502
Li3Mn2O5/Li13Mn8O20/order10	-6.26402
Li3Mn2O5/Li13Mn8O20/order0	-6.27049
Li3Mn2O5/Li13Mn8O20/order4	-6.27158
Li3Mn2O5/Li13Mn8O20/order12	-6.26764
Li3Mn2O5/Li13Mn8O20/order17	-6.26866
Li3Mn2O5/Li13Mn8O20/order16	-6.26702
Li3Mn2O5/Li13Mn8O20/order2	-6.26584
Li3Mn2O5/Li13Mn8O20/order18	-6.26812
Li3Mn2O5/Li13Mn8O20/order6	-6.26596
Li3Mn2O5/Li13Mn8O20/order15	-6.26649
Li3Mn2O5/Li13Mn8O20/order8	-6.26565
Li3Mn2O5/Li13Mn8O20/order14	-6.2669
Li3Mn2O5/Li13Mn8O20/order7	-6.26133
Li3Mn2O5/Li13Mn8O20/order19	-6.27213
Li3Mn2O5/Li13Mn8O20/order13	-6.26642
Li3Mn2O5/Li13Mn8O20/order11	-6.26435
Li3Mn2O5/Li13Mn8O20/order5	-6.26962
Li3Mn2O5/Li13Mn8O20/order1	-6.27063
Li3Mn2O5/Li13Mn8O20/order3	-6.27212
Li3Mn2O5/Li13Mn8O20/order20	-6.2651
Li3Mn2O5/Li4Mn2O5/order9	-6.07711
Li3Mn2O5/Li4Mn2O5/order10	-6.10426
Li3Mn2O5/Li4Mn2O5/order33	-6.11105
Li3Mn2O5/Li4Mn2O5/order36	-6.06278
Li3Mn2O5/Li4Mn2O5/order28	-6.06996
Li3Mn2O5/Li4Mn2O5/order0	-6.08171
Li3Mn2O5/Li4Mn2O5/order4	-6.0689
Li3Mn2O5/Li4Mn2O5/order35	-6.08344
Li3Mn2O5/Li4Mn2O5/order12	-6.0589
Li3Mn2O5/Li4Mn2O5/order31	-6.07162
Li3Mn2O5/Li4Mn2O5/order17	-6.02825
Li3Mn2O5/Li4Mn2O5/order23	-6.07543
Li3Mn2O5/Li4Mn2O5/order16	-6.08234
Li3Mn2O5/Li4Mn2O5/order2	-6.05914
Li3Mn2O5/Li4Mn2O5/order18	-6.06441
Li3Mn2O5/Li4Mn2O5/order6	-6.04832
Li3Mn2O5/Li4Mn2O5/order15	-6.11338
Li3Mn2O5/Li4Mn2O5/order8	-6.06553
Li3Mn2O5/Li4Mn2O5/order29	-6.06299
Li3Mn2O5/Li4Mn2O5/order14	-6.03738
Li3Mn2O5/Li4Mn2O5/order7	-6.0824
Li3Mn2O5/Li4Mn2O5/order21	-6.0705
Li3Mn2O5/Li4Mn2O5/order32	-6.11273
Li3Mn2O5/Li4Mn2O5/order37	-6.03845
Li3Mn2O5/Li4Mn2O5/order19	-6.11304
Li3Mn2O5/Li4Mn2O5/order26	-6.06391
Li3Mn2O5/Li4Mn2O5/order13	-6.05
Li3Mn2O5/Li4Mn2O5/order11	-6.07561
Li3Mn2O5/Li4Mn2O5/order27	-6.08168
Li3Mn2O5/Li4Mn2O5/order5	-6.04771
Li3Mn2O5/Li4Mn2O5/order1	-6.05165
Li3Mn2O5/Li4Mn2O5/order3	-6.05647
Li3Mn2O5/Li4Mn2O5/order24	-6.0645
Li3Mn2O5/Li4Mn2O5/order25	-6.06048
Li3Mn2O5/Li4Mn2O5/order34	-6.05912
Li3Mn2O5/Li4Mn2O5/order22	-6.06977
Li3Mn2O5/Li4Mn2O5/order20	-6.03308
Li3Mn2O5/Li4Mn2O5/order30	-6.0473
Li3Mn2O5/Li9Mn4O10/order9	-5.89533
Li3Mn2O5/Li9Mn4O10/order10	-5.92403
Li3Mn2O5/Li9Mn4O10/order33	-5.93049
Li3Mn2O5/Li9Mn4O10/order36	-5.93612
Li3Mn2O5/Li9Mn4O10/order28	-5.93618
Li3Mn2O5/Li9Mn4O10/order0	-5.92449
Li3Mn2O5/Li9Mn4O10/order4	-5.90884
Li3Mn2O5/Li9Mn4O10/order35	-5.93486
Li3Mn2O5/Li9Mn4O10/order12	-5.93648
Li3Mn2O5/Li9Mn4O10/order31	-5.93358
Li3Mn2O5/Li9Mn4O10/order17	-5.92071
Li3Mn2O5/Li9Mn4O10/order23	-5.92391
Li3Mn2O5/Li9Mn4O10/order16	-5.90664
Li3Mn2O5/Li9Mn4O10/order2	-5.92794
Li3Mn2O5/Li9Mn4O10/order18	-5.91809
Li3Mn2O5/Li9Mn4O10/order6	-5.91838
Li3Mn2O5/Li9Mn4O10/order15	-5.92321
Li3Mn2O5/Li9Mn4O10/order8	-5.92534
Li3Mn2O5/Li9Mn4O10/order29	-5.94858
Li3Mn2O5/Li9Mn4O10/order14	-5.92238
Li3Mn2O5/Li9Mn4O10/order7	-5.94578
Li3Mn2O5/Li9Mn4O10/order21	-5.92421
Li3Mn2O5/Li9Mn4O10/order32	-5.97083
Li3Mn2O5/Li9Mn4O10/order37	-5.94227
Li3Mn2O5/Li9Mn4O10/order19	-5.92549
Li3Mn2O5/Li9Mn4O10/order26	-5.9202
Li3Mn2O5/Li9Mn4O10/order13	-5.94695
Li3Mn2O5/Li9Mn4O10/order11	-5.93263
Li3Mn2O5/Li9Mn4O10/order27	-5.94073
Li3Mn2O5/Li9Mn4O10/order5	-5.91818
Li3Mn2O5/Li9Mn4O10/order1	-5.94047
Li3Mn2O5/Li9Mn4O10/order3	-5.93569
Li3Mn2O5/Li9Mn4O10/order24	-5.93558
Li3Mn2O5/Li9Mn4O10/order25	-5.91439
Li3Mn2O5/Li9Mn4O10/order34	-5.9097
Li3Mn2O5/Li9Mn4O10/order22	-5.93402
Li3Mn2O5/Li9Mn4O10/order20	-5.92934
Li3Mn2O5/Li9Mn4O10/order30	-5.90988
Li3Mn2O5/Li19Mn8O20/order9	-5.88354
Li3Mn2O5/Li19Mn8O20/order10	-5.8645
Li3Mn2O5/Li19Mn8O20/order28	-5.87229
Li3Mn2O5/Li19Mn8O20/order0	-5.85784
Li3Mn2O5/Li19Mn8O20/order4	-5.86224
Li3Mn2O5/Li19Mn8O20/order12	-5.86204
Li3Mn2O5/Li19Mn8O20/order31	-5.87418
Li3Mn2O5/Li19Mn8O20/order17	-5.86502
Li3Mn2O5/Li19Mn8O20/order23	-5.87003
Li3Mn2O5/Li19Mn8O20/order16	-5.86604
Li3Mn2O5/Li19Mn8O20/order2	-5.86786
Li3Mn2O5/Li19Mn8O20/order18	-5.86548
Li3Mn2O5/Li19Mn8O20/order6	-5.86392
Li3Mn2O5/Li19Mn8O20/order15	-5.87707
Li3Mn2O5/Li19Mn8O20/order8	-5.85281
Li3Mn2O5/Li19Mn8O20/order29	-5.88709
Li3Mn2O5/Li19Mn8O20/order14	-5.87665
Li3Mn2O5/Li19Mn8O20/order7	-5.87177
Li3Mn2O5/Li19Mn8O20/order21	-5.88585
Li3Mn2O5/Li19Mn8O20/order19	-5.86291
Li3Mn2O5/Li19Mn8O20/order26	-5.88448
Li3Mn2O5/Li19Mn8O20/order13	-5.85765
Li3Mn2O5/Li19Mn8O20/order11	-5.88298
Li3Mn2O5/Li19Mn8O20/order27	-5.87336
Li3Mn2O5/Li19Mn8O20/order5	-5.87303
Li3Mn2O5/Li19Mn8O20/order1	-5.87628
Li3Mn2O5/Li19Mn8O20/order3	-5.87925
Li3Mn2O5/Li19Mn8O20/order24	-5.8577
Li3Mn2O5/Li19Mn8O20/order25	-5.87088
Li3Mn2O5/Li19Mn8O20/order22	-5.84463
Li3Mn2O5/Li19Mn8O20/order20	-5.87734
Li3Mn2O5/Li19Mn8O20/order30	-5.86217
Li3Mn2O5/Li27Mn16O40/order0	-6.23078
Li3Mn2O5/Li27Mn16O40/order4	-6.22679
Li3Mn2O5/Li27Mn16O40/order2	-6.23289
Li3Mn2O5/Li27Mn16O40/order6	-6.23073
Li3Mn2O5/Li27Mn16O40/order5	-6.2305
Li3Mn2O5/Li27Mn16O40/order1	-6.23073
Li3Mn2O5/Li27Mn16O40/order3	-6.23111
Li3Mn2O5/Li5Mn2O5/order9	-5.78759
Li3Mn2O5/Li5Mn2O5/order10	-5.80624
Li3Mn2O5/Li5Mn2O5/order28	-5.8095
Li3Mn2O5/Li5Mn2O5/order0	-5.78371
Li3Mn2O5/Li5Mn2O5/order4	-5.81774
Li3Mn2O5/Li5Mn2O5/order12	-5.82018
Li3Mn2O5/Li5Mn2O5/order17	-5.82044
Li3Mn2O5/Li5Mn2O5/order23	-5.81352
Li3Mn2O5/Li5Mn2O5/order16	-5.83213
Li3Mn2O5/Li5Mn2O5/order2	-5.8204
Li3Mn2O5/Li5Mn2O5/order18	-5.82492
Li3Mn2O5/Li5Mn2O5/order6	-5.82093
Li3Mn2O5/Li5Mn2O5/order15	-5.79761
Li3Mn2O5/Li5Mn2O5/order8	-5.80435
Li3Mn2O5/Li5Mn2O5/order14	-5.80773
Li3Mn2O5/Li5Mn2O5/order7	-5.82633
Li3Mn2O5/Li5Mn2O5/order21	-5.78735
Li3Mn2O5/Li5Mn2O5/order19	-5.8051
Li3Mn2O5/Li5Mn2O5/order26	-5.79591
Li3Mn2O5/Li5Mn2O5/order13	-5.80024
Li3Mn2O5/Li5Mn2O5/order11	-5.80802
Li3Mn2O5/Li5Mn2O5/order27	-5.8428
Li3Mn2O5/Li5Mn2O5/order5	-5.82132
Li3Mn2O5/Li5Mn2O5/order1	-5.80126
Li3Mn2O5/Li5Mn2O5/order3	-5.81093
Li3Mn2O5/Li5Mn2O5/order24	-5.82374
Li3Mn2O5/Li5Mn2O5/order25	-5.79953
Li3Mn2O5/Li5Mn2O5/order22	-5.81032
Li3Mn2O5/Li5Mn2O5/order20	-5.82672
Li3Mn2O5/Li17Mn8O20/order9	-6.00281
Li3Mn2O5/Li17Mn8O20/order10	-6.00209
Li3Mn2O5/Li17Mn8O20/order0	-5.97754
Li3Mn2O5/Li17Mn8O20/order4	-5.98549
Li3Mn2O5/Li17Mn8O20/order12	-5.97063
Li3Mn2O5/Li17Mn8O20/order17	-5.98942
Li3Mn2O5/Li17Mn8O20/order23	-5.96693
Li3Mn2O5/Li17Mn8O20/order16	-5.96855
Li3Mn2O5/Li17Mn8O20/order2	-6.01225
Li3Mn2O5/Li17Mn8O20/order18	-6.0057
Li3Mn2O5/Li17Mn8O20/order6	-5.96928
Li3Mn2O5/Li17Mn8O20/order15	-5.99037
Li3Mn2O5/Li17Mn8O20/order8	-5.99355
Li3Mn2O5/Li17Mn8O20/order14	-5.97784
Li3Mn2O5/Li17Mn8O20/order7	-5.98678
Li3Mn2O5/Li17Mn8O20/order21	-5.99427
Li3Mn2O5/Li17Mn8O20/order19	-5.9838
Li3Mn2O5/Li17Mn8O20/order13	-6.00565
Li3Mn2O5/Li17Mn8O20/order11	-6.00291
Li3Mn2O5/Li17Mn8O20/order5	-5.98764
Li3Mn2O5/Li17Mn8O20/order1	-5.98796
Li3Mn2O5/Li17Mn8O20/order3	-5.99493
Li3Mn2O5/Li17Mn8O20/order24	-5.98911
Li3Mn2O5/Li17Mn8O20/order25	-6.00583
Li3Mn2O5/Li17Mn8O20/order22	-6.01046
Li3Mn2O5/Li17Mn8O20/order20	-6.01491
Li3Mn2O5/Li31Mn16O40/order9	-6.09121
Li3Mn2O5/Li31Mn16O40/order10	-6.09059
Li3Mn2O5/Li31Mn16O40/order28	-6.09525
Li3Mn2O5/Li31Mn16O40/order0	-6.10451
Li3Mn2O5/Li31Mn16O40/order4	-6.10749
Li3Mn2O5/Li31Mn16O40/order12	-6.10482
Li3Mn2O5/Li31Mn16O40/order17	-6.07653
Li3Mn2O5/Li31Mn16O40/order23	-6.0828
Li3Mn2O5/Li31Mn16O40/order16	-6.08565
Li3Mn2O5/Li31Mn16O40/order2	-6.10413
Li3Mn2O5/Li31Mn16O40/order18	-6.08597
Li3Mn2O5/Li31Mn16O40/order6	-6.08713
Li3Mn2O5/Li31Mn16O40/order15	-6.10406
Li3Mn2O5/Li31Mn16O40/order8	-6.10648
Li3Mn2O5/Li31Mn16O40/order14	-6.10644
Li3Mn2O5/Li31Mn16O40/order7	-6.09284
Li3Mn2O5/Li31Mn16O40/order21	-6.0818
Li3Mn2O5/Li31Mn16O40/order19	-6.09696
Li3Mn2O5/Li31Mn16O40/order26	-6.08995
Li3Mn2O5/Li31Mn16O40/order13	-6.10169
Li3Mn2O5/Li31Mn16O40/order11	-6.09102
Li3Mn2O5/Li31Mn16O40/order27	-6.10265
Li3Mn2O5/Li31Mn16O40/order5	-6.09378
Li3Mn2O5/Li31Mn16O40/order1	-6.08893
Li3Mn2O5/Li31Mn16O40/order3	-6.10645
Li3Mn2O5/Li31Mn16O40/order24	-6.08155
Li3Mn2O5/Li31Mn16O40/order25	-6.0908
Li3Mn2O5/Li31Mn16O40/order22	-6.10616
Li3Mn2O5/Li31Mn16O40/order20	-6.08472
Li3Mn2O5/Li25Mn16O40/order0	-6.30932
Li3Mn2O5/Li25Mn16O40/order4	-6.30931
Li3Mn2O5/Li25Mn16O40/order2	-6.30231
Li3Mn2O5/Li25Mn16O40/order6	-6.30902
Li3Mn2O5/Li25Mn16O40/order7	-6.30485
Li3Mn2O5/Li25Mn16O40/order5	-6.30888
Li3Mn2O5/Li25Mn16O40/order1	-6.30517
Li3Mn2O5/Li25Mn16O40/order3	-6.30557
Li3Mn2O5/Li15Mn8O20/order9	-6.13261
Li3Mn2O5/Li15Mn8O20/order10	-6.12209
Li3Mn2O5/Li15Mn8O20/order28	-6.12736
Li3Mn2O5/Li15Mn8O20/order0	-6.13202
Li3Mn2O5/Li15Mn8O20/order4	-6.12145
Li3Mn2O5/Li15Mn8O20/order12	-6.12526
Li3Mn2O5/Li15Mn8O20/order17	-6.13303
Li3Mn2O5/Li15Mn8O20/order23	-6.13421
Li3Mn2O5/Li15Mn8O20/order16	-6.13285
Li3Mn2O5/Li15Mn8O20/order2	-6.12865
Li3Mn2O5/Li15Mn8O20/order18	-6.13134
Li3Mn2O5/Li15Mn8O20/order6	-6.12367
Li3Mn2O5/Li15Mn8O20/order15	-6.1335
Li3Mn2O5/Li15Mn8O20/order8	-6.12477
Li3Mn2O5/Li15Mn8O20/order14	-6.13819
Li3Mn2O5/Li15Mn8O20/order7	-6.12567
Li3Mn2O5/Li15Mn8O20/order21	-6.12644
Li3Mn2O5/Li15Mn8O20/order19	-6.13135
Li3Mn2O5/Li15Mn8O20/order26	-6.12014
Li3Mn2O5/Li15Mn8O20/order13	-6.12225
Li3Mn2O5/Li15Mn8O20/order11	-6.13421
Li3Mn2O5/Li15Mn8O20/order27	-6.1208
Li3Mn2O5/Li15Mn8O20/order5	-6.12088
Li3Mn2O5/Li15Mn8O20/order1	-6.13276
Li3Mn2O5/Li15Mn8O20/order3	-6.13244
Li3Mn2O5/Li15Mn8O20/order24	-6.1254
Li3Mn2O5/Li15Mn8O20/order25	-6.13244
Li3Mn2O5/Li15Mn8O20/order22	-6.13272
Li3Mn2O5/Li15Mn8O20/order20	-6.12972
Li3Fe2O5/str0	-5.81446
Li3Fe2O5/str3	-5.81407
Li3Fe2O5/str15	-5.79115
Li3Fe2O5/str14	-5.78142
Li3Fe2O5/str11	-5.8107
Li3Fe2O5/str2	-5.81917
Li3Fe2O5/str7	-5.81888
Li3Fe2O5/str6	-5.82667
Li3Fe2O5/str4	-5.83421
Li3Fe2O5/str1	-5.82555
Li3Fe2O5/str8	-5.81986
Li3Fe2O5/str12	-5.81614
Li3Fe2O5/str9	-5.81628
Li3Fe2O5/str13	-5.80759
Li3Fe2O5/str10	-5.8396
Li3Fe2O5/str5	-5.83796
Li3Fe2O5/Li25_Fe2O5_8/order0	-5.81917
Li3Fe2O5/Li25_Fe2O5_8/order4	-5.8127
Li3Fe2O5/Li25_Fe2O5_8/order2	-5.81347
Li3Fe2O5/Li25_Fe2O5_8/order6	-5.81915
Li3Fe2O5/Li25_Fe2O5_8/order5	-5.81907
Li3Fe2O5/Li25_Fe2O5_8/order1	-5.81386
Li3Fe2O5/Li25_Fe2O5_8/order3	-5.81441
Li3Fe2O5/Li4Fe2O5/order9	-5.66804
Li3Fe2O5/Li4Fe2O5/order10	-5.67846
Li3Fe2O5/Li4Fe2O5/order28	-5.66682
Li3Fe2O5/Li4Fe2O5/order0	-5.66723
Li3Fe2O5/Li4Fe2O5/order4	-5.67955
Li3Fe2O5/Li4Fe2O5/order12	-5.65763
Li3Fe2O5/Li4Fe2O5/order17	-5.64421
Li3Fe2O5/Li4Fe2O5/order23	-5.66024
Li3Fe2O5/Li4Fe2O5/order16	-5.67962
Li3Fe2O5/Li4Fe2O5/order2	-5.67935
Li3Fe2O5/Li4Fe2O5/order18	-5.65885
Li3Fe2O5/Li4Fe2O5/order6	-5.67618
Li3Fe2O5/Li4Fe2O5/order15	-5.62392
Li3Fe2O5/Li4Fe2O5/order8	-5.67424
Li3Fe2O5/Li4Fe2O5/order29	-5.69272
Li3Fe2O5/Li4Fe2O5/order14	-5.6684
Li3Fe2O5/Li4Fe2O5/order7	-5.67507
Li3Fe2O5/Li4Fe2O5/order21	-5.66257
Li3Fe2O5/Li4Fe2O5/order19	-5.67449
Li3Fe2O5/Li4Fe2O5/order26	-5.66996
Li3Fe2O5/Li4Fe2O5/order13	-5.65739
Li3Fe2O5/Li4Fe2O5/order11	-5.66392
Li3Fe2O5/Li4Fe2O5/order27	-5.66844
Li3Fe2O5/Li4Fe2O5/order5	-5.68337
Li3Fe2O5/Li4Fe2O5/order1	-5.67788
Li3Fe2O5/Li4Fe2O5/order3	-5.67825
Li3Fe2O5/Li4Fe2O5/order24	-5.66196
Li3Fe2O5/Li4Fe2O5/order25	-5.70351
Li3Fe2O5/Li4Fe2O5/order22	-5.66302
Li3Fe2O5/Li4Fe2O5/order20	-5.65412
Li3Fe2O5/Li13_Fe2O5_4/order9	-5.79527
Li3Fe2O5/Li13_Fe2O5_4/order10	-5.79639
Li3Fe2O5/Li13_Fe2O5_4/order0	-5.80039
Li3Fe2O5/Li13_Fe2O5_4/order4	-5.8004
Li3Fe2O5/Li13_Fe2O5_4/order12	-5.80002
Li3Fe2O5/Li13_Fe2O5_4/order2	-5.80035
Li3Fe2O5/Li13_Fe2O5_4/order6	-5.79289
Li3Fe2O5/Li13_Fe2O5_4/order15	-5.7902
Li3Fe2O5/Li13_Fe2O5_4/order8	-5.79578
Li3Fe2O5/Li13_Fe2O5_4/order14	-5.79381
Li3Fe2O5/Li13_Fe2O5_4/order7	-5.795
Li3Fe2O5/Li13_Fe2O5_4/order13	-5.79537
Li3Fe2O5/Li13_Fe2O5_4/order11	-5.79607
Li3Fe2O5/Li13_Fe2O5_4/order5	-5.79423
Li3Fe2O5/Li13_Fe2O5_4/order1	-5.79787
Li3Fe2O5/Li13_Fe2O5_4/order3	-5.80083
Li3Fe2O5/Li15_Fe2O5_4/order9	-5.71627
Li3Fe2O5/Li15_Fe2O5_4/order10	-5.71794
Li3Fe2O5/Li15_Fe2O5_4/order28	-5.70277
Li3Fe2O5/Li15_Fe2O5_4/order0	-5.71606
Li3Fe2O5/Li15_Fe2O5_4/order4	-5.72066
Li3Fe2O5/Li15_Fe2O5_4/order12	-5.71855
Li3Fe2O5/Li15_Fe2O5_4/order17	-5.7124
Li3Fe2O5/Li15_Fe2O5_4/order23	-5.7083
Li3Fe2O5/Li15_Fe2O5_4/order16	-5.71482
Li3Fe2O5/Li15_Fe2O5_4/order2	-5.7166
Li3Fe2O5/Li15_Fe2O5_4/order18	-5.71724
Li3Fe2O5/Li15_Fe2O5_4/order6	-5.7065
Li3Fe2O5/Li15_Fe2O5_4/order15	-5.71365
Li3Fe2O5/Li15_Fe2O5_4/order8	-5.71576
Li3Fe2O5/Li15_Fe2O5_4/order14	-5.71628
Li3Fe2O5/Li15_Fe2O5_4/order7	-5.71831
Li3Fe2O5/Li15_Fe2O5_4/order21	-5.71507
Li3Fe2O5/Li15_Fe2O5_4/order19	-5.71429
Li3Fe2O5/Li15_Fe2O5_4/order26	-5.71407
Li3Fe2O5/Li15_Fe2O5_4/order13	-5.71805
Li3Fe2O5/Li15_Fe2O5_4/order11	-5.71547
Li3Fe2O5/Li15_Fe2O5_4/order27	-5.71695
Li3Fe2O5/Li15_Fe2O5_4/order5	-5.71346
Li3Fe2O5/Li15_Fe2O5_4/order1	-5.71546
Li3Fe2O5/Li15_Fe2O5_4/order3	-5.71533
Li3Fe2O5/Li15_Fe2O5_4/order24	-5.7162
Li3Fe2O5/Li15_Fe2O5_4/order25	-5.71593
Li3Fe2O5/Li15_Fe2O5_4/order22	-5.7198
Li3Fe2O5/Li15_Fe2O5_4/order20	-5.71595
Li3Fe2O5/Li17_Fe2O5_4/order9	-5.59729
Li3Fe2O5/Li17_Fe2O5_4/order10	-5.63492
Li3Fe2O5/Li17_Fe2O5_4/order0	-5.64619
Li3Fe2O5/Li17_Fe2O5_4/order4	-5.64539
Li3Fe2O5/Li17_Fe2O5_4/order12	-5.6061
Li3Fe2O5/Li17_Fe2O5_4/order17	-5.61047
Li3Fe2O5/Li17_Fe2O5_4/order23	-5.65094
Li3Fe2O5/Li17_Fe2O5_4/order16	-5.60185
Li3Fe2O5/Li17_Fe2O5_4/order2	-5.64717
Li3Fe2O5/Li17_Fe2O5_4/order18	-5.63693
Li3Fe2O5/Li17_Fe2O5_4/order6	-5.60583
Li3Fe2O5/Li17_Fe2O5_4/order15	-5.64902
Li3Fe2O5/Li17_Fe2O5_4/order8	-5.64542
Li3Fe2O5/Li17_Fe2O5_4/order14	-5.61644
Li3Fe2O5/Li17_Fe2O5_4/order7	-5.64127
Li3Fe2O5/Li17_Fe2O5_4/order21	-5.63325
Li3Fe2O5/Li17_Fe2O5_4/order19	-5.63309
Li3Fe2O5/Li17_Fe2O5_4/order13	-5.64532
Li3Fe2O5/Li17_Fe2O5_4/order11	-5.60639
Li3Fe2O5/Li17_Fe2O5_4/order5	-5.64735
Li3Fe2O5/Li17_Fe2O5_4/order1	-5.64705
Li3Fe2O5/Li17_Fe2O5_4/order3	-5.60787
Li3Fe2O5/Li17_Fe2O5_4/order24	-5.6257
Li3Fe2O5/Li17_Fe2O5_4/order25	-5.64037
Li3Fe2O5/Li17_Fe2O5_4/order22	-5.60179
Li3Fe2O5/Li17_Fe2O5_4/order20	-5.64734
Li3Fe2O5/Li7_Fe2O5_2/order9	-5.75705
Li3Fe2O5/Li7_Fe2O5_2/order10	-5.75565
Li3Fe2O5/Li7_Fe2O5_2/order0	-5.76583
Li3Fe2O5/Li7_Fe2O5_2/order4	-5.7598
Li3Fe2O5/Li7_Fe2O5_2/order12	-5.73905
Li3Fe2O5/Li7_Fe2O5_2/order2	-5.75356
Li3Fe2O5/Li7_Fe2O5_2/order6	-5.75969
Li3Fe2O5/Li7_Fe2O5_2/order8	-5.75484
Li3Fe2O5/Li7_Fe2O5_2/order7	-5.75429
Li3Fe2O5/Li7_Fe2O5_2/order13	-5.75364
Li3Fe2O5/Li7_Fe2O5_2/order11	-5.75957
Li3Fe2O5/Li7_Fe2O5_2/order5	-5.75435
Li3Fe2O5/Li7_Fe2O5_2/order1	-5.76569
Li3Fe2O5/Li7_Fe2O5_2/order3	-5.76231
Li3Fe2O5/Li19_Fe2O5_4/order9	-5.54364
Li3Fe2O5/Li19_Fe2O5_4/order10	-5.54691
Li3Fe2O5/Li19_Fe2O5_4/order28	-5.54436
Li3Fe2O5/Li19_Fe2O5_4/order0	-5.54188
Li3Fe2O5/Li19_Fe2O5_4/order4	-5.54762
Li3Fe2O5/Li19_Fe2O5_4/order12	-5.53217
Li3Fe2O5/Li19_Fe2O5_4/order31	-5.53851
Li3Fe2O5/Li19_Fe2O5_4/order17	-5.54133
Li3Fe2O5/Li19_Fe2O5_4/order23	-5.53869
Li3Fe2O5/Li19_Fe2O5_4/order16	-5.54313
Li3Fe2O5/Li19_Fe2O5_4/order2	-5.54416
Li3Fe2O5/Li19_Fe2O5_4/order18	-5.5479
Li3Fe2O5/Li19_Fe2O5_4/order6	-5.54845
Li3Fe2O5/Li19_Fe2O5_4/order15	-5.5437
Li3Fe2O5/Li19_Fe2O5_4/order8	-5.53987
Li3Fe2O5/Li19_Fe2O5_4/order29	-5.54329
Li3Fe2O5/Li19_Fe2O5_4/order14	-5.5488
Li3Fe2O5/Li19_Fe2O5_4/order7	-5.54554
Li3Fe2O5/Li19_Fe2O5_4/order21	-5.54578
Li3Fe2O5/Li19_Fe2O5_4/order19	-5.54006
Li3Fe2O5/Li19_Fe2O5_4/order26	-5.54433
Li3Fe2O5/Li19_Fe2O5_4/order13	-5.54642
Li3Fe2O5/Li19_Fe2O5_4/order11	-5.54643
Li3Fe2O5/Li19_Fe2O5_4/order27	-5.5443
Li3Fe2O5/Li19_Fe2O5_4/order5	-5.54045
Li3Fe2O5/Li19_Fe2O5_4/order1	-5.53653
Li3Fe2O5/Li19_Fe2O5_4/order3	-5.53738
Li3Fe2O5/Li19_Fe2O5_4/order24	-5.54341
Li3Fe2O5/Li19_Fe2O5_4/order25	-5.54453
Li3Fe2O5/Li19_Fe2O5_4/order22	-5.54507
Li3Fe2O5/Li19_Fe2O5_4/order20	-5.54981
Li3Fe2O5/Li19_Fe2O5_4/order30	-5.54436
Li3Fe2O5/Li29_Fe2O5_8/order0	-5.73985
Li3Fe2O5/Li29_Fe2O5_8/order4	-5.7374
Li3Fe2O5/Li29_Fe2O5_8/order2	-5.73313
Li3Fe2O5/Li29_Fe2O5_8/order6	-5.7332
Li3Fe2O5/Li29_Fe2O5_8/order5	-5.72781
Li3Fe2O5/Li29_Fe2O5_8/order1	-5.73987
Li3Fe2O5/Li29_Fe2O5_8/order3	-5.73789
Li3Fe2O5/Li31_Fe2O5_8/order9	-5.69352
Li3Fe2O5/Li31_Fe2O5_8/order10	-5.71737
Li3Fe2O5/Li31_Fe2O5_8/order28	-5.69722
Li3Fe2O5/Li31_Fe2O5_8/order0	-5.69651
Li3Fe2O5/Li31_Fe2O5_8/order4	-5.69494
Li3Fe2O5/Li31_Fe2O5_8/order12	-5.69479
Li3Fe2O5/Li31_Fe2O5_8/order23	-5.69754
Li3Fe2O5/Li31_Fe2O5_8/order16	-5.69552
Li3Fe2O5/Li31_Fe2O5_8/order2	-5.69868
Li3Fe2O5/Li31_Fe2O5_8/order18	-5.69412
Li3Fe2O5/Li31_Fe2O5_8/order6	-5.69656
Li3Fe2O5/Li31_Fe2O5_8/order15	-5.69243
Li3Fe2O5/Li31_Fe2O5_8/order8	-5.69547
Li3Fe2O5/Li31_Fe2O5_8/order14	-5.69272
Li3Fe2O5/Li31_Fe2O5_8/order7	-5.68972
Li3Fe2O5/Li31_Fe2O5_8/order21	-5.69255
Li3Fe2O5/Li31_Fe2O5_8/order19	-5.69486
Li3Fe2O5/Li31_Fe2O5_8/order26	-5.71081
Li3Fe2O5/Li31_Fe2O5_8/order13	-5.6896
Li3Fe2O5/Li31_Fe2O5_8/order11	-5.69243
Li3Fe2O5/Li31_Fe2O5_8/order27	-5.69487
Li3Fe2O5/Li31_Fe2O5_8/order5	-5.6906
Li3Fe2O5/Li31_Fe2O5_8/order1	-5.69679
Li3Fe2O5/Li31_Fe2O5_8/order3	-5.69057
Li3Fe2O5/Li31_Fe2O5_8/order24	-5.71524
Li3Fe2O5/Li31_Fe2O5_8/order25	-5.69435
Li3Fe2O5/Li31_Fe2O5_8/order22	-5.71527
Li3Fe2O5/Li31_Fe2O5_8/order20	-5.69199
Li3Fe2O5/Li9_Fe2O5_2/order9	-5.5886
Li3Fe2O5/Li9_Fe2O5_2/order10	-5.59247
Li3Fe2O5/Li9_Fe2O5_2/order33	-5.58837
Li3Fe2O5/Li9_Fe2O5_2/order36	-5.59319
Li3Fe2O5/Li9_Fe2O5_2/order28	-5.58905
Li3Fe2O5/Li9_Fe2O5_2/order0	-5.549
Li3Fe2O5/Li9_Fe2O5_2/order4	-5.5934
Li3Fe2O5/Li9_Fe2O5_2/order35	-5.58752
Li3Fe2O5/Li9_Fe2O5_2/order12	-5.59608
Li3Fe2O5/Li9_Fe2O5_2/order31	-5.5903
Li3Fe2O5/Li9_Fe2O5_2/order17	-5.59463
Li3Fe2O5/Li9_Fe2O5_2/order23	-5.5784
Li3Fe2O5/Li9_Fe2O5_2/order16	-5.56788
Li3Fe2O5/Li9_Fe2O5_2/order2	-5.59112
Li3Fe2O5/Li9_Fe2O5_2/order18	-5.59397
Li3Fe2O5/Li9_Fe2O5_2/order6	-5.59833
Li3Fe2O5/Li9_Fe2O5_2/order15	-5.59423
Li3Fe2O5/Li9_Fe2O5_2/order8	-5.55082
Li3Fe2O5/Li9_Fe2O5_2/order29	-5.58633
Li3Fe2O5/Li9_Fe2O5_2/order14	-5.58963
Li3Fe2O5/Li9_Fe2O5_2/order7	-5.57487
Li3Fe2O5/Li9_Fe2O5_2/order21	-5.59005
Li3Fe2O5/Li9_Fe2O5_2/order32	-5.58649
Li3Fe2O5/Li9_Fe2O5_2/order37	-5.59525
Li3Fe2O5/Li9_Fe2O5_2/order19	-5.60006
Li3Fe2O5/Li9_Fe2O5_2/order26	-5.59018
Li3Fe2O5/Li9_Fe2O5_2/order13	-5.55409
Li3Fe2O5/Li9_Fe2O5_2/order11	-5.59017
Li3Fe2O5/Li9_Fe2O5_2/order27	-5.58877
Li3Fe2O5/Li9_Fe2O5_2/order5	-5.59596
Li3Fe2O5/Li9_Fe2O5_2/order1	-5.59715
Li3Fe2O5/Li9_Fe2O5_2/order3	-5.59442
Li3Fe2O5/Li9_Fe2O5_2/order24	-5.59384
Li3Fe2O5/Li9_Fe2O5_2/order25	-5.58543
Li3Fe2O5/Li9_Fe2O5_2/order34	-5.58623
Li3Fe2O5/Li9_Fe2O5_2/order22	-5.58896
Li3Fe2O5/Li9_Fe2O5_2/order20	-5.58745
Li3Fe2O5/Li9_Fe2O5_2/order30	-5.59189
Li3Fe2O5/Li5Fe2O5/order9	-5.4446
Li3Fe2O5/Li5Fe2O5/order10	-5.45489
Li3Fe2O5/Li5Fe2O5/order33	-5.50054
Li3Fe2O5/Li5Fe2O5/order36	-5.46605
Li3Fe2O5/Li5Fe2O5/order28	-5.43842
Li3Fe2O5/Li5Fe2O5/order0	-5.50737
Li3Fe2O5/Li5Fe2O5/order4	-5.50624
Li3Fe2O5/Li5Fe2O5/order35	-5.45782
Li3Fe2O5/Li5Fe2O5/order38	-5.50452
Li3Fe2O5/Li5Fe2O5/order12	-5.43245
Li3Fe2O5/Li5Fe2O5/order31	-5.41753
Li3Fe2O5/Li5Fe2O5/order17	-5.42869
Li3Fe2O5/Li5Fe2O5/order23	-5.49303
Li3Fe2O5/Li5Fe2O5/order40	-5.50529
Li3Fe2O5/Li5Fe2O5/order16	-5.49796
Li3Fe2O5/Li5Fe2O5/order2	-5.50237
Li3Fe2O5/Li5Fe2O5/order18	-5.49796
Li3Fe2O5/Li5Fe2O5/order6	-5.50278
Li3Fe2O5/Li5Fe2O5/order15	-5.4927
Li3Fe2O5/Li5Fe2O5/order8	-5.50397
Li3Fe2O5/Li5Fe2O5/order29	-5.4473
Li3Fe2O5/Li5Fe2O5/order14	-5.49613
Li3Fe2O5/Li5Fe2O5/order7	-5.50071
Li3Fe2O5/Li5Fe2O5/order21	-5.49831
Li3Fe2O5/Li5Fe2O5/order32	-5.50114
Li3Fe2O5/Li5Fe2O5/order37	-5.4572
Li3Fe2O5/Li5Fe2O5/order42	-5.43668
Li3Fe2O5/Li5Fe2O5/order19	-5.50623
Li3Fe2O5/Li5Fe2O5/order26	-5.50164
Li3Fe2O5/Li5Fe2O5/order13	-5.49297
Li3Fe2O5/Li5Fe2O5/order11	-5.50056
Li3Fe2O5/Li5Fe2O5/order27	-5.42817
Li3Fe2O5/Li5Fe2O5/order5	-5.49084
Li3Fe2O5/Li5Fe2O5/order1	-5.47703
Li3Fe2O5/Li5Fe2O5/order39	-5.48542
Li3Fe2O5/Li5Fe2O5/order41	-5.45511
Li3Fe2O5/Li5Fe2O5/order3	-5.49637
Li3Fe2O5/Li5Fe2O5/order43	-5.50252
Li3Fe2O5/Li5Fe2O5/order24	-5.49822
Li3Fe2O5/Li5Fe2O5/order25	-5.47135
Li3Fe2O5/Li5Fe2O5/order34	-5.43932
Li3Fe2O5/Li5Fe2O5/order22	-5.49894
Li3Fe2O5/Li5Fe2O5/order20	-5.5008
Li3Fe2O5/Li5Fe2O5/order30	-5.46857
Li3Fe2O5/Li27_Fe2O5_8/order0	-5.78213
Li3Fe2O5/Li27_Fe2O5_8/order4	-5.77852
Li3Fe2O5/Li27_Fe2O5_8/order2	-5.77633
Li3Fe2O5/Li27_Fe2O5_8/order6	-5.77718
Li3Fe2O5/Li27_Fe2O5_8/order5	-5.76847
Li3Fe2O5/Li27_Fe2O5_8/order1	-5.78213
Li3Fe2O5/Li27_Fe2O5_8/order3	-5.7786
Li3Co2O5/str0	-5.43413
Li3Co2O5/str3	-5.43003
Li3Co2O5/str15	-5.44356
Li3Co2O5/str14	-5.39999
Li3Co2O5/str11	-5.44318
Li3Co2O5/str2	-5.4249
Li3Co2O5/str7	-5.4373
Li3Co2O5/str6	-5.4358
Li3Co2O5/str4	-5.4435
Li3Co2O5/str1	-5.4179
Li3Co2O5/str8	-5.4352
Li3Co2O5/str12	-5.45541
Li3Co2O5/str9	-5.43875
Li3Co2O5/str13	-5.44657
Li3Co2O5/str10	-5.44852
Li3Co2O5/str5	-5.43249
Li3Co2O5/Li19_Co2O5_4/order10	-5.20365
Li3Co2O5/Li19_Co2O5_4/order28	-5.20746
Li3Co2O5/Li19_Co2O5_4/order31	-5.20756
Li3Co2O5/Li19_Co2O5_4/order17	-5.23275
Li3Co2O5/Li19_Co2O5_4/order16	-5.21785
Li3Co2O5/Li19_Co2O5_4/order18	-5.24676
Li3Co2O5/Li19_Co2O5_4/order6	-5.23099
Li3Co2O5/Li19_Co2O5_4/order15	-5.20924
Li3Co2O5/Li19_Co2O5_4/order8	-5.21989
Li3Co2O5/Li19_Co2O5_4/order29	-5.23754
Li3Co2O5/Li19_Co2O5_4/order14	-5.22284
Li3Co2O5/Li19_Co2O5_4/order13	-5.18164
Li3Co2O5/Li19_Co2O5_4/order11	-5.23168
Li3Co2O5/Li19_Co2O5_4/order27	-5.21686
Li3Co2O5/Li19_Co2O5_4/order1	-5.22448
Li3Co2O5/Li19_Co2O5_4/order3	-5.24473
Li3Co2O5/Li19_Co2O5_4/order24	-5.22906
Li3Co2O5/Li19_Co2O5_4/order25	-5.22148
Li3Co2O5/Li19_Co2O5_4/order20	-5.19406
Li3Co2O5/Li19_Co2O5_4/order30	-5.21527
Li3Co2O5/Li31_Co2O5_8/order9	-5.29629
Li3Co2O5/Li31_Co2O5_8/order10	-5.3353
Li3Co2O5/Li31_Co2O5_8/order28	-5.3208
Li3Co2O5/Li31_Co2O5_8/order0	-5.30131
Li3Co2O5/Li31_Co2O5_8/order4	-5.30088
Li3Co2O5/Li31_Co2O5_8/order12	-5.30636
Li3Co2O5/Li31_Co2O5_8/order17	-5.31315
Li3Co2O5/Li31_Co2O5_8/order23	-5.32988
Li3Co2O5/Li31_Co2O5_8/order16	-5.32725
Li3Co2O5/Li31_Co2O5_8/order2	-5.32227
Li3Co2O5/Li31_Co2O5_8/order18	-5.33287
Li3Co2O5/Li31_Co2O5_8/order6	-5.3016
Li3Co2O5/Li31_Co2O5_8/order15	-5.31327
Li3Co2O5/Li31_Co2O5_8/order8	-5.32171
Li3Co2O5/Li31_Co2O5_8/order29	-5.32508
Li3Co2O5/Li31_Co2O5_8/order14	-5.31422
Li3Co2O5/Li31_Co2O5_8/order7	-5.32404
Li3Co2O5/Li31_Co2O5_8/order21	-5.30736
Li3Co2O5/Li31_Co2O5_8/order26	-5.30098
Li3Co2O5/Li31_Co2O5_8/order13	-5.30757
Li3Co2O5/Li31_Co2O5_8/order11	-5.3171
Li3Co2O5/Li31_Co2O5_8/order27	-5.3021
Li3Co2O5/Li31_Co2O5_8/order5	-5.30748
Li3Co2O5/Li31_Co2O5_8/order3	-5.33058
Li3Co2O5/Li31_Co2O5_8/order24	-5.3039
Li3Co2O5/Li31_Co2O5_8/order25	-5.34332
Li3Co2O5/Li31_Co2O5_8/order22	-5.31256
Li3Co2O5/Li31_Co2O5_8/order20	-5.31528
Li3Co2O5/Li17_Co2O5_4/order9	-5.27274
Li3Co2O5/Li17_Co2O5_4/order10	-5.28133
Li3Co2O5/Li17_Co2O5_4/order0	-5.26858
Li3Co2O5/Li17_Co2O5_4/order4	-5.26897
Li3Co2O5/Li17_Co2O5_4/order12	-5.26902
Li3Co2O5/Li17_Co2O5_4/order17	-5.28044
Li3Co2O5/Li17_Co2O5_4/order23	-5.27202
Li3Co2O5/Li17_Co2O5_4/order16	-5.26394
Li3Co2O5/Li17_Co2O5_4/order2	-5.27474
Li3Co2O5/Li17_Co2O5_4/order18	-5.28115
Li3Co2O5/Li17_Co2O5_4/order6	-5.25055
Li3Co2O5/Li17_Co2O5_4/order15	-5.28549
Li3Co2O5/Li17_Co2O5_4/order8	-5.29739
Li3Co2O5/Li17_Co2O5_4/order14	-5.26798
Li3Co2O5/Li17_Co2O5_4/order7	-5.26557
Li3Co2O5/Li17_Co2O5_4/order21	-5.27357
Li3Co2O5/Li17_Co2O5_4/order19	-5.26738
Li3Co2O5/Li17_Co2O5_4/order13	-5.29913
Li3Co2O5/Li17_Co2O5_4/order11	-5.2626
Li3Co2O5/Li17_Co2O5_4/order1	-5.28995
Li3Co2O5/Li17_Co2O5_4/order3	-5.25274
Li3Co2O5/Li17_Co2O5_4/order24	-5.2625
Li3Co2O5/Li17_Co2O5_4/order25	-5.28307
Li3Co2O5/Li17_Co2O5_4/order22	-5.2852
Li3Co2O5/Li17_Co2O5_4/order20	-5.24435
Li3Co2O5/Li27_Co2O5_8/order10	-5.37969
Li3Co2O5/Li27_Co2O5_8/order0	-5.38319
Li3Co2O5/Li27_Co2O5_8/order4	-5.38228
Li3Co2O5/Li27_Co2O5_8/order12	-5.38125
Li3Co2O5/Li27_Co2O5_8/order2	-5.38429
Li3Co2O5/Li27_Co2O5_8/order8	-5.38451
Li3Co2O5/Li27_Co2O5_8/order7	-5.38352
Li3Co2O5/Li27_Co2O5_8/order13	-5.3802
Li3Co2O5/Li27_Co2O5_8/order11	-5.38264
Li3Co2O5/Li27_Co2O5_8/order3	-5.38356
Li3Co2O5/Li13_Co2O5_4/order9	-5.40058
Li3Co2O5/Li13_Co2O5_4/order10	-5.39897
Li3Co2O5/Li13_Co2O5_4/order0	-5.40487
Li3Co2O5/Li13_Co2O5_4/order4	-5.4047
Li3Co2O5/Li13_Co2O5_4/order17	-5.3956
Li3Co2O5/Li13_Co2O5_4/order18	-5.39409
Li3Co2O5/Li13_Co2O5_4/order6	-5.40204
Li3Co2O5/Li13_Co2O5_4/order15	-5.40481
Li3Co2O5/Li13_Co2O5_4/order8	-5.4024
Li3Co2O5/Li13_Co2O5_4/order14	-5.40041
Li3Co2O5/Li13_Co2O5_4/order7	-5.40288
Li3Co2O5/Li13_Co2O5_4/order13	-5.39823
Li3Co2O5/Li13_Co2O5_4/order11	-5.399
Li3Co2O5/Li13_Co2O5_4/order5	-5.40431
Li3Co2O5/Li13_Co2O5_4/order1	-5.40155
Li3Co2O5/Li13_Co2O5_4/order3	-5.40271
Li3Co2O5/Li25_Co2O5_8/order9	-5.41206
Li3Co2O5/Li25_Co2O5_8/order0	-5.42315
Li3Co2O5/Li25_Co2O5_8/order4	-5.41462
Li3Co2O5/Li25_Co2O5_8/order2	-5.41669
Li3Co2O5/Li25_Co2O5_8/order6	-5.41678
Li3Co2O5/Li25_Co2O5_8/order8	-5.421
Li3Co2O5/Li25_Co2O5_8/order7	-5.41735
Li3Co2O5/Li25_Co2O5_8/order11	-5.42316
Li3Co2O5/Li25_Co2O5_8/order5	-5.41837
Li3Co2O5/Li25_Co2O5_8/order1	-5.42239
Li3Co2O5/Li25_Co2O5_8/order3	-5.41806
Li3Co2O5/Li4Co2O5/order9	-5.29433
Li3Co2O5/Li4Co2O5/order10	-5.29153
Li3Co2O5/Li4Co2O5/order33	-5.29058
Li3Co2O5/Li4Co2O5/order36	-5.29098
Li3Co2O5/Li4Co2O5/order28	-5.28884
Li3Co2O5/Li4Co2O5/order0	-5.28157
Li3Co2O5/Li4Co2O5/order4	-5.32423
Li3Co2O5/Li4Co2O5/order35	-5.28201
Li3Co2O5/Li4Co2O5/order38	-5.28506
Li3Co2O5/Li4Co2O5/order12	-5.28176
Li3Co2O5/Li4Co2O5/order31	-5.3346
Li3Co2O5/Li4Co2O5/order17	-5.30796
Li3Co2O5/Li4Co2O5/order44	-5.29306
Li3Co2O5/Li4Co2O5/order23	-5.30603
Li3Co2O5/Li4Co2O5/order45	-5.27201
Li3Co2O5/Li4Co2O5/order40	-5.28622
Li3Co2O5/Li4Co2O5/order16	-5.28733
Li3Co2O5/Li4Co2O5/order49	-5.26361
Li3Co2O5/Li4Co2O5/order2	-5.28964
Li3Co2O5/Li4Co2O5/order18	-5.27576
Li3Co2O5/Li4Co2O5/order6	-5.30621
Li3Co2O5/Li4Co2O5/order15	-5.29377
Li3Co2O5/Li4Co2O5/order8	-5.30407
Li3Co2O5/Li4Co2O5/order29	-5.27302
Li3Co2O5/Li4Co2O5/order14	-5.27044
Li3Co2O5/Li4Co2O5/order7	-5.31066
Li3Co2O5/Li4Co2O5/order21	-5.29493
Li3Co2O5/Li4Co2O5/order32	-5.31238
Li3Co2O5/Li4Co2O5/order37	-5.27855
Li3Co2O5/Li4Co2O5/order46	-5.27531
Li3Co2O5/Li4Co2O5/order42	-5.30838
Li3Co2O5/Li4Co2O5/order19	-5.32153
Li3Co2O5/Li4Co2O5/order26	-5.30279
Li3Co2O5/Li4Co2O5/order13	-5.28182
Li3Co2O5/Li4Co2O5/order11	-5.28249
Li3Co2O5/Li4Co2O5/order27	-5.30556
Li3Co2O5/Li4Co2O5/order5	-5.2955
Li3Co2O5/Li4Co2O5/order1	-5.31673
Li3Co2O5/Li4Co2O5/order39	-5.29513
Li3Co2O5/Li4Co2O5/order41	-5.29037
Li3Co2O5/Li4Co2O5/order3	-5.31085
Li3Co2O5/Li4Co2O5/order43	-5.31147
Li3Co2O5/Li4Co2O5/order48	-5.31093
Li3Co2O5/Li4Co2O5/order24	-5.29043
Li3Co2O5/Li4Co2O5/order25	-5.29265
Li3Co2O5/Li4Co2O5/order34	-5.27669
Li3Co2O5/Li4Co2O5/order47	-5.27452
Li3Co2O5/Li4Co2O5/order22	-5.3008
Li3Co2O5/Li4Co2O5/order20	-5.3093
Li3Co2O5/Li4Co2O5/order30	-5.28264
Li3Co2O5/Li29_Co2O5_8/order9	-5.33721
Li3Co2O5/Li29_Co2O5_8/order10	-5.34492
Li3Co2O5/Li29_Co2O5_8/order0	-5.34183
Li3Co2O5/Li29_Co2O5_8/order4	-5.34202
Li3Co2O5/Li29_Co2O5_8/order2	-5.34206
Li3Co2O5/Li29_Co2O5_8/order6	-5.34305
Li3Co2O5/Li29_Co2O5_8/order8	-5.34201
Li3Co2O5/Li29_Co2O5_8/order11	-5.33959
Li3Co2O5/Li29_Co2O5_8/order5	-5.33707
Li3Co2O5/Li29_Co2O5_8/order1	-5.34009
Li3Co2O5/Li9_Co2O5_2/order10	-5.24842
Li3Co2O5/Li9_Co2O5_2/order33	-5.21598
Li3Co2O5/Li9_Co2O5_2/order4	-5.25212
Li3Co2O5/Li9_Co2O5_2/order35	-5.25808
Li3Co2O5/Li9_Co2O5_2/order12	-5.21733
Li3Co2O5/Li9_Co2O5_2/order31	-5.25187
Li3Co2O5/Li9_Co2O5_2/order23	-5.24765
Li3Co2O5/Li9_Co2O5_2/order2	-5.2256
Li3Co2O5/Li9_Co2O5_2/order18	-5.24242
Li3Co2O5/Li9_Co2O5_2/order6	-5.22912
Li3Co2O5/Li9_Co2O5_2/order15	-5.23059
Li3Co2O5/Li9_Co2O5_2/order8	-5.27559
Li3Co2O5/Li9_Co2O5_2/order7	-5.26182
Li3Co2O5/Li9_Co2O5_2/order32	-5.23297
Li3Co2O5/Li9_Co2O5_2/order37	-5.24171
Li3Co2O5/Li9_Co2O5_2/order19	-5.25837
Li3Co2O5/Li9_Co2O5_2/order26	-5.21402
Li3Co2O5/Li9_Co2O5_2/order13	-5.26784
Li3Co2O5/Li9_Co2O5_2/order11	-5.24891
Li3Co2O5/Li9_Co2O5_2/order27	-5.24146
Li3Co2O5/Li9_Co2O5_2/order5	-5.25578
Li3Co2O5/Li9_Co2O5_2/order1	-5.25595
Li3Co2O5/Li9_Co2O5_2/order3	-5.25686
Li3Co2O5/Li9_Co2O5_2/order24	-5.25022
Li3Co2O5/Li9_Co2O5_2/order25	-5.24641
Li3Co2O5/Li9_Co2O5_2/order34	-5.23951
Li3Co2O5/Li9_Co2O5_2/order20	-5.2303
Li3Co2O5/Li9_Co2O5_2/order30	-5.26824
Li3Co2O5/Li15_Co2O5_4/order9	-5.32227
Li3Co2O5/Li15_Co2O5_4/order10	-5.33292
Li3Co2O5/Li15_Co2O5_4/order0	-5.32201
Li3Co2O5/Li15_Co2O5_4/order4	-5.31952
Li3Co2O5/Li15_Co2O5_4/order12	-5.31737
Li3Co2O5/Li15_Co2O5_4/order31	-5.33112
Li3Co2O5/Li15_Co2O5_4/order17	-5.34678
Li3Co2O5/Li15_Co2O5_4/order23	-5.31737
Li3Co2O5/Li15_Co2O5_4/order16	-5.31998
Li3Co2O5/Li15_Co2O5_4/order6	-5.31906
Li3Co2O5/Li15_Co2O5_4/order15	-5.33982
Li3Co2O5/Li15_Co2O5_4/order29	-5.34
Li3Co2O5/Li15_Co2O5_4/order7	-5.32586
Li3Co2O5/Li15_Co2O5_4/order21	-5.33498
Li3Co2O5/Li15_Co2O5_4/order19	-5.32609
Li3Co2O5/Li15_Co2O5_4/order13	-5.32348
Li3Co2O5/Li15_Co2O5_4/order11	-5.32069
Li3Co2O5/Li15_Co2O5_4/order27	-5.32836
Li3Co2O5/Li15_Co2O5_4/order5	-5.32078
Li3Co2O5/Li15_Co2O5_4/order1	-5.319
Li3Co2O5/Li15_Co2O5_4/order24	-5.32925
Li3Co2O5/Li15_Co2O5_4/order25	-5.32967
Li3Co2O5/Li15_Co2O5_4/order20	-5.3203
Li3Co2O5/Li15_Co2O5_4/order30	-5.3317
Li3Co2O5/Li7_Co2O5_2/order9	-5.36379
Li3Co2O5/Li7_Co2O5_2/order10	-5.3643
Li3Co2O5/Li7_Co2O5_2/order0	-5.36352
Li3Co2O5/Li7_Co2O5_2/order4	-5.36005
Li3Co2O5/Li7_Co2O5_2/order12	-5.35536
Li3Co2O5/Li7_Co2O5_2/order17	-5.36253
Li3Co2O5/Li7_Co2O5_2/order16	-5.35918
Li3Co2O5/Li7_Co2O5_2/order2	-5.36492
Li3Co2O5/Li7_Co2O5_2/order18	-5.35882
Li3Co2O5/Li7_Co2O5_2/order6	-5.36371
Li3Co2O5/Li7_Co2O5_2/order15	-5.36289
Li3Co2O5/Li7_Co2O5_2/order8	-5.36093
Li3Co2O5/Li7_Co2O5_2/order14	-5.36283
Li3Co2O5/Li7_Co2O5_2/order7	-5.36479
Li3Co2O5/Li7_Co2O5_2/order19	-5.36348
Li3Co2O5/Li7_Co2O5_2/order13	-5.36367
Li3Co2O5/Li7_Co2O5_2/order11	-5.36114
Li3Co2O5/Li7_Co2O5_2/order5	-5.36227
Li3Co2O5/Li7_Co2O5_2/order1	-5.36382
Li3Co2O5/Li7_Co2O5_2/order3	-5.36202
Li3Co2O5/Li7_Co2O5_2/order20	-5.36044
Li3Co2O5/Li5Co2O5/order9	-5.18174
Li3Co2O5/Li5Co2O5/order10	-5.1817
Li3Co2O5/Li5Co2O5/order33	-5.17233
Li3Co2O5/Li5Co2O5/order36	-5.15513
Li3Co2O5/Li5Co2O5/order28	-5.20935
Li3Co2O5/Li5Co2O5/order0	-5.16396
Li3Co2O5/Li5Co2O5/order4	-5.20609
Li3Co2O5/Li5Co2O5/order35	-5.18283
Li3Co2O5/Li5Co2O5/order38	-5.21284
Li3Co2O5/Li5Co2O5/order12	-5.17544
Li3Co2O5/Li5Co2O5/order31	-5.18647
Li3Co2O5/Li5Co2O5/order17	-5.2197
Li3Co2O5/Li5Co2O5/order44	-5.18517
Li3Co2O5/Li5Co2O5/order23	-5.2141
Li3Co2O5/Li5Co2O5/order45	-5.2133
Li3Co2O5/Li5Co2O5/order40	-5.16192
Li3Co2O5/Li5Co2O5/order16	-5.21232
Li3Co2O5/Li5Co2O5/order49	-5.14747
Li3Co2O5/Li5Co2O5/order2	-5.20526
Li3Co2O5/Li5Co2O5/order18	-5.18645
Li3Co2O5/Li5Co2O5/order6	-5.17189
Li3Co2O5/Li5Co2O5/order15	-5.19444
Li3Co2O5/Li5Co2O5/order8	-5.1852
Li3Co2O5/Li5Co2O5/order29	-5.21446
Li3Co2O5/Li5Co2O5/order14	-5.17555
Li3Co2O5/Li5Co2O5/order7	-5.21329
Li3Co2O5/Li5Co2O5/order21	-5.15257
Li3Co2O5/Li5Co2O5/order32	-5.19272
Li3Co2O5/Li5Co2O5/order37	-5.21826
Li3Co2O5/Li5Co2O5/order46	-5.20094
Li3Co2O5/Li5Co2O5/order42	-5.24003
Li3Co2O5/Li5Co2O5/order19	-5.19652
Li3Co2O5/Li5Co2O5/order26	-5.19663
Li3Co2O5/Li5Co2O5/order13	-5.21445
Li3Co2O5/Li5Co2O5/order11	-5.17557
Li3Co2O5/Li5Co2O5/order27	-5.22981
Li3Co2O5/Li5Co2O5/order5	-5.20457
Li3Co2O5/Li5Co2O5/order1	-5.17691
Li3Co2O5/Li5Co2O5/order39	-5.18606
Li3Co2O5/Li5Co2O5/order41	-5.20747
Li3Co2O5/Li5Co2O5/order3	-5.17043
Li3Co2O5/Li5Co2O5/order43	-5.17056
Li3Co2O5/Li5Co2O5/order48	-5.20559
Li3Co2O5/Li5Co2O5/order24	-5.16125
Li3Co2O5/Li5Co2O5/order25	-5.22232
Li3Co2O5/Li5Co2O5/order34	-5.20286
Li3Co2O5/Li5Co2O5/order47	-5.15563
Li3Co2O5/Li5Co2O5/order22	-5.22299
Li3Co2O5/Li5Co2O5/order20	-5.21581
Li3Co2O5/Li5Co2O5/order30	-5.15972
Li3Ni2O5/str0	-4.78574
Li3Ni2O5/str3	-4.78436
Li3Ni2O5/str15	-4.79433
Li3Ni2O5/str14	-4.77872
Li3Ni2O5/str11	-4.79591
Li3Ni2O5/str2	-4.81385
Li3Ni2O5/str7	-4.81784
Li3Ni2O5/str6	-4.83422
Li3Ni2O5/str4	-4.85778
Li3Ni2O5/str1	-4.82329
Li3Ni2O5/str8	-4.82071
Li3Ni2O5/str12	-4.78501
Li3Ni2O5/str9	-4.79643
Li3Ni2O5/str13	-4.80802
Li3Ni2O5/str10	-4.86237
Li3Ni2O5/str5	-4.83952
Li3Ni2O5/Li31_Ni2O5_8/order9	-4.73407
Li3Ni2O5/Li31_Ni2O5_8/order10	-4.73362
Li3Ni2O5/Li31_Ni2O5_8/order28	-4.72832
Li3Ni2O5/Li31_Ni2O5_8/order0	-4.73981
Li3Ni2O5/Li31_Ni2O5_8/order4	-4.72129
Li3Ni2O5/Li31_Ni2O5_8/order12	-4.74564
Li3Ni2O5/Li31_Ni2O5_8/order17	-4.73039
Li3Ni2O5/Li31_Ni2O5_8/order23	-4.72662
Li3Ni2O5/Li31_Ni2O5_8/order16	-4.73711
Li3Ni2O5/Li31_Ni2O5_8/order2	-4.74574
Li3Ni2O5/Li31_Ni2O5_8/order18	-4.72131
Li3Ni2O5/Li31_Ni2O5_8/order6	-4.71407
Li3Ni2O5/Li31_Ni2O5_8/order15	-4.73611
Li3Ni2O5/Li31_Ni2O5_8/order8	-4.73474
Li3Ni2O5/Li31_Ni2O5_8/order14	-4.7391
Li3Ni2O5/Li31_Ni2O5_8/order7	-4.73242
Li3Ni2O5/Li31_Ni2O5_8/order21	-4.72905
Li3Ni2O5/Li31_Ni2O5_8/order19	-4.74704
Li3Ni2O5/Li31_Ni2O5_8/order26	-4.72327
Li3Ni2O5/Li31_Ni2O5_8/order13	-4.72302
Li3Ni2O5/Li31_Ni2O5_8/order11	-4.73573
Li3Ni2O5/Li31_Ni2O5_8/order27	-4.70855
Li3Ni2O5/Li31_Ni2O5_8/order5	-4.7278
Li3Ni2O5/Li31_Ni2O5_8/order1	-4.73149
Li3Ni2O5/Li31_Ni2O5_8/order3	-4.73005
Li3Ni2O5/Li31_Ni2O5_8/order24	-4.72417
Li3Ni2O5/Li31_Ni2O5_8/order25	-4.72318
Li3Ni2O5/Li31_Ni2O5_8/order22	-4.72042
Li3Ni2O5/Li31_Ni2O5_8/order20	-4.72328
Li3Ni2O5/Li25_Ni2O5_8/order0	-4.84609
Li3Ni2O5/Li25_Ni2O5_8/order4	-4.81368
Li3Ni2O5/Li25_Ni2O5_8/order2	-4.84093
Li3Ni2O5/Li25_Ni2O5_8/order6	-4.84613
Li3Ni2O5/Li25_Ni2O5_8/order5	-4.8454
Li3Ni2O5/Li25_Ni2O5_8/order1	-4.83525
Li3Ni2O5/Li25_Ni2O5_8/order3	-4.83195
Li3Ni2O5/Li7_Ni2O5_2/order9	-4.77965
Li3Ni2O5/Li7_Ni2O5_2/order10	-4.78947
Li3Ni2O5/Li7_Ni2O5_2/order0	-4.80531
Li3Ni2O5/Li7_Ni2O5_2/order4	-4.78732
Li3Ni2O5/Li7_Ni2O5_2/order12	-4.76602
Li3Ni2O5/Li7_Ni2O5_2/order2	-4.78927
Li3Ni2O5/Li7_Ni2O5_2/order6	-4.798
Li3Ni2O5/Li7_Ni2O5_2/order8	-4.78325
Li3Ni2O5/Li7_Ni2O5_2/order7	-4.77855
Li3Ni2O5/Li7_Ni2O5_2/order13	-4.79733
Li3Ni2O5/Li7_Ni2O5_2/order11	-4.76687
Li3Ni2O5/Li7_Ni2O5_2/order5	-4.78256
Li3Ni2O5/Li7_Ni2O5_2/order1	-4.79422
Li3Ni2O5/Li7_Ni2O5_2/order3	-4.78391
Li3Ni2O5/Li17_Ni2O5_4/order9	-4.72387
Li3Ni2O5/Li17_Ni2O5_4/order10	-4.72927
Li3Ni2O5/Li17_Ni2O5_4/order0	-4.68864
Li3Ni2O5/Li17_Ni2O5_4/order4	-4.72011
Li3Ni2O5/Li17_Ni2O5_4/order12	-4.70448
Li3Ni2O5/Li17_Ni2O5_4/order17	-4.71897
Li3Ni2O5/Li17_Ni2O5_4/order23	-4.73027
Li3Ni2O5/Li17_Ni2O5_4/order16	-4.70034
Li3Ni2O5/Li17_Ni2O5_4/order2	-4.73202
Li3Ni2O5/Li17_Ni2O5_4/order18	-4.71331
Li3Ni2O5/Li17_Ni2O5_4/order6	-4.72359
Li3Ni2O5/Li17_Ni2O5_4/order15	-4.71613
Li3Ni2O5/Li17_Ni2O5_4/order8	-4.71807
Li3Ni2O5/Li17_Ni2O5_4/order14	-4.73841
Li3Ni2O5/Li17_Ni2O5_4/order7	-4.79649
Li3Ni2O5/Li17_Ni2O5_4/order21	-4.73191
Li3Ni2O5/Li17_Ni2O5_4/order19	-4.73549
Li3Ni2O5/Li17_Ni2O5_4/order13	-4.72888
Li3Ni2O5/Li17_Ni2O5_4/order11	-4.70007
Li3Ni2O5/Li17_Ni2O5_4/order5	-4.7197
Li3Ni2O5/Li17_Ni2O5_4/order1	-4.72755
Li3Ni2O5/Li17_Ni2O5_4/order3	-4.70327
Li3Ni2O5/Li17_Ni2O5_4/order24	-4.73767
Li3Ni2O5/Li17_Ni2O5_4/order25	-4.71682
Li3Ni2O5/Li17_Ni2O5_4/order22	-4.73906
Li3Ni2O5/Li17_Ni2O5_4/order20	-4.69683
Li3Ni2O5/Li13_Ni2O5_4/order9	-4.81641
Li3Ni2O5/Li13_Ni2O5_4/order10	-4.82479
Li3Ni2O5/Li13_Ni2O5_4/order0	-4.83338
Li3Ni2O5/Li13_Ni2O5_4/order4	-4.83458
Li3Ni2O5/Li13_Ni2O5_4/order12	-4.82755
Li3Ni2O5/Li13_Ni2O5_4/order2	-4.83158
Li3Ni2O5/Li13_Ni2O5_4/order6	-4.82493
Li3Ni2O5/Li13_Ni2O5_4/order15	-4.80321
Li3Ni2O5/Li13_Ni2O5_4/order8	-4.82351
Li3Ni2O5/Li13_Ni2O5_4/order14	-4.82325
Li3Ni2O5/Li13_Ni2O5_4/order7	-4.81131
Li3Ni2O5/Li13_Ni2O5_4/order13	-4.83269
Li3Ni2O5/Li13_Ni2O5_4/order11	-4.82565
Li3Ni2O5/Li13_Ni2O5_4/order5	-4.82528
Li3Ni2O5/Li13_Ni2O5_4/order1	-4.82203
Li3Ni2O5/Li13_Ni2O5_4/order3	-4.83179
Li3Ni2O5/Li27_Ni2O5_8/order0	-4.80872
Li3Ni2O5/Li27_Ni2O5_8/order4	-4.79846
Li3Ni2O5/Li27_Ni2O5_8/order2	-4.80915
Li3Ni2O5/Li27_Ni2O5_8/order6	-4.81045
Li3Ni2O5/Li27_Ni2O5_8/order5	-4.80361
Li3Ni2O5/Li27_Ni2O5_8/order1	-4.81894
Li3Ni2O5/Li27_Ni2O5_8/order3	-4.81213
Li3Ni2O5/Li15_Ni2O5_4/order9	-4.74538
Li3Ni2O5/Li15_Ni2O5_4/order28	-4.73866
Li3Ni2O5/Li15_Ni2O5_4/order0	-4.7563
Li3Ni2O5/Li15_Ni2O5_4/order4	-4.74948
Li3Ni2O5/Li15_Ni2O5_4/order12	-4.74884
Li3Ni2O5/Li15_Ni2O5_4/order17	-4.75733
Li3Ni2O5/Li15_Ni2O5_4/order23	-4.72546
Li3Ni2O5/Li15_Ni2O5_4/order16	-4.7479
Li3Ni2O5/Li15_Ni2O5_4/order2	-4.74904
Li3Ni2O5/Li15_Ni2O5_4/order18	-4.75565
Li3Ni2O5/Li15_Ni2O5_4/order6	-4.74217
Li3Ni2O5/Li15_Ni2O5_4/order15	-4.74824
Li3Ni2O5/Li15_Ni2O5_4/order8	-4.76247
Li3Ni2O5/Li15_Ni2O5_4/order14	-4.75825
Li3Ni2O5/Li15_Ni2O5_4/order7	-4.74955
Li3Ni2O5/Li15_Ni2O5_4/order21	-4.75009
Li3Ni2O5/Li15_Ni2O5_4/order19	-4.74016
Li3Ni2O5/Li15_Ni2O5_4/order26	-4.72768
Li3Ni2O5/Li15_Ni2O5_4/order13	-4.74405
Li3Ni2O5/Li15_Ni2O5_4/order11	-4.75367
Li3Ni2O5/Li15_Ni2O5_4/order27	-4.74257
Li3Ni2O5/Li15_Ni2O5_4/order5	-4.74716
Li3Ni2O5/Li15_Ni2O5_4/order1	-4.74509
Li3Ni2O5/Li15_Ni2O5_4/order3	-4.75396
Li3Ni2O5/Li15_Ni2O5_4/order24	-4.75031
Li3Ni2O5/Li15_Ni2O5_4/order25	-4.74515
Li3Ni2O5/Li15_Ni2O5_4/order22	-4.74299
Li3Ni2O5/Li15_Ni2O5_4/order20	-4.77257
Li3Ni2O5/Li9_Ni2O5_2/order9	-4.72762
Li3Ni2O5/Li9_Ni2O5_2/order10	-4.74798
Li3Ni2O5/Li9_Ni2O5_2/order33	-4.71963
Li3Ni2O5/Li9_Ni2O5_2/order36	-4.72702
Li3Ni2O5/Li9_Ni2O5_2/order28	-4.72532
Li3Ni2O5/Li9_Ni2O5_2/order0	-4.7104
Li3Ni2O5/Li9_Ni2O5_2/order4	-4.69942
Li3Ni2O5/Li9_Ni2O5_2/order35	-4.73877
Li3Ni2O5/Li9_Ni2O5_2/order12	-4.73834
Li3Ni2O5/Li9_Ni2O5_2/order31	-4.72978
Li3Ni2O5/Li9_Ni2O5_2/order17	-4.7447
Li3Ni2O5/Li9_Ni2O5_2/order23	-4.71278
Li3Ni2O5/Li9_Ni2O5_2/order16	-4.73783
Li3Ni2O5/Li9_Ni2O5_2/order2	-4.70926
Li3Ni2O5/Li9_Ni2O5_2/order18	-4.71118
Li3Ni2O5/Li9_Ni2O5_2/order6	-4.72466
[truncated: 5,242 more rows]
