# Supplementary material for: Design principle of disordered rocksalt type overlithiated anode for high energy density batteries
Source: Royal Society of Chemistry journal article supplement (doi:10.1039/d4mh00715h), 2024-01-01
Supplement: d4mh00715h2.pdf [file d4mh00715h2.pdf]

## Design Principle of Disordered Rocksalt Type Overlithiated Anode for High Energy Density Batteries

Yufang He<sup>1</sup>, Zhengda He<sup>1</sup>, Bin Ouyang<sup>1,\*</sup>

<sup>1</sup>Department of Chemistry and Biochemistry, Florida State University, Tallahassee, FL  
32304

\*Email: [bouyang@fsu.edu](mailto:bouyang@fsu.edu)

**Table S1.** The average voltage, capacity, and energy density of 23 redox centers of overlithiated disordered rock-salt (DRX)  $\text{Li}_{3+x}\text{M}_2\text{O}_5$  ( $0 \leq x \leq 2$ ) (M= Ti, V, Cr, Mn, Fe, Co, Ni, Cu, Ge, Zr, Nb, Mo, Rh, Ru, Sn, Sb, Te, Hf, Ta, W, Re, Ir, and Ce) and reported  $\text{Li}_{4+x}\text{Ti}_5\text{O}_{12}$  ( $0 \leq x \leq 3$ ).

| DRX $\text{Li}_{3+x}\text{M}_2\text{O}_5$ ( $0 \leq x \leq 2$ ) | Average voltage (V) | Capacity (mAh/g) | Energy density (Wh/kg) |
|-----------------------------------------------------------------|---------------------|------------------|------------------------|
| $\text{Li}_{3+x}\text{Ti}_2\text{O}_5$                          | 0.0                 | 0.0              | 0.0                    |
| $\text{Li}_{3+x}\text{V}_2\text{O}_5$                           | 0.48                | 264.44           | 930.22                 |
| $\text{Li}_{3+x}\text{Cr}_2\text{O}_5$                          | 1.14                | 261.72           | 749.05                 |
| $\text{Li}_{3+x}\text{Mn}_2\text{O}_5$                          | 1.39                | 254.41           | 663.02                 |
| $\text{Li}_{3+x}\text{Fe}_2\text{O}_5$                          | 1.94                | 252.24           | 519.74                 |
| $\text{Li}_{3+x}\text{Co}_2\text{O}_5$                          | 2.26                | 245.11           | 427.37                 |
| $\text{Li}_{3+x}\text{Ni}_2\text{O}_5$                          | 2.41                | 245.65           | 391.68                 |
| $\text{Li}_{3+x}\text{Cu}_2\text{O}_5$                          | 2.87                | 235.19           | 265.49                 |
| $\text{Li}_{3+x}\text{Ge}_2\text{O}_5$                          | 1.58                | 217.801          | 527.79                 |
| $\text{Li}_{3+x}\text{Zr}_2\text{O}_5$                          | 0.0                 | 0.0              | 0.0                    |
| $\text{Li}_{3+x}\text{Nb}_2\text{O}_5$                          | 0.19                | 187.01           | 711.60                 |
| $\text{Li}_{3+x}\text{Mo}_2\text{O}_5$                          | 1.27                | 91.57            | 249.30                 |
| $\text{Li}_{3+x}\text{Rh}_2\text{O}_5$                          | 1.32                | 174.81           | 469.17                 |
| $\text{Li}_{3+x}\text{Ru}_2\text{O}_5$                          | 0.98                | 176.93           | 535.21                 |
| $\text{Li}_{3+x}\text{Sn}_2\text{O}_5$                          | 1.43                | 158.48           | 407.12                 |
| $\text{Li}_{3+x}\text{Sb}_2\text{O}_5$                          | 1.71                | 155.67           | 356.31                 |
| $\text{Li}_{3+x}\text{Te}_2\text{O}_5$                          | 1.85                | 150.56           | 323.15                 |
| $\text{Li}_{3+x}\text{Hf}_2\text{O}_5$                          | 0.0                 | 0.0              | 0.0                    |
| $\text{Li}_{3+x}\text{Ta}_2\text{O}_5$                          | 0.0                 | 0.0              | 0.0                    |
| $\text{Li}_{3+x}\text{W}_2\text{O}_5$                           | 0.28                | 85.81            | 318.97                 |
| $\text{Li}_{3+x}\text{Re}_2\text{O}_5$                          | 1.22                | 113.27           | 315.18                 |
| $\text{Li}_{3+x}\text{Ir}_2\text{O}_5$                          | 1.70                | 110.46           | 254.62                 |
| $\text{Li}_{3+x}\text{Ce}_2\text{O}_5$                          | 0.21                | 43.96            | 166.39                 |
| $\text{Li}_{4+x}\text{Ti}_5\text{O}_{12}$ ( $0 \leq x \leq 3$ ) | 1.55                | 175.14           | 429.09                 |

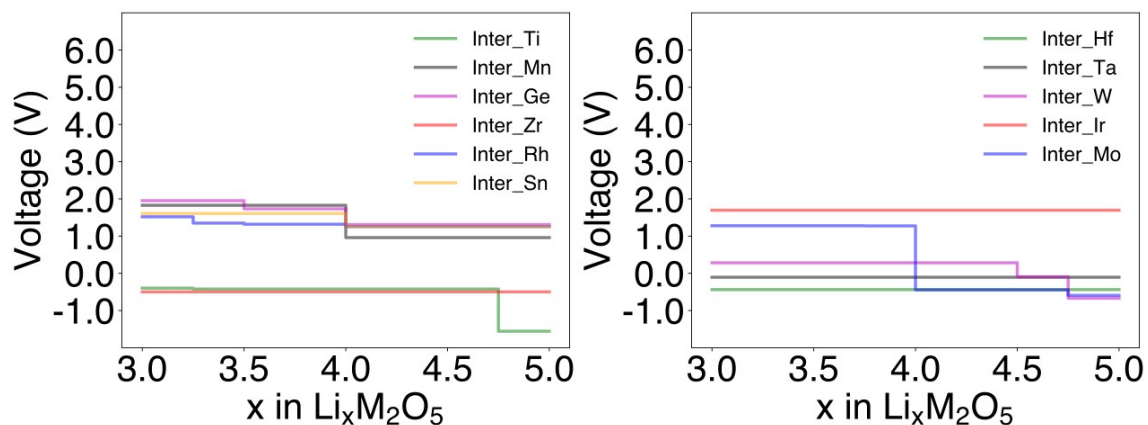

**Fig. S1:** the intercalation voltage of DRX  $\text{Li}_{3+x}\text{M}_2\text{O}_5$  ( $0 \leq x \leq 2$ ) (M = Ti, Mn, Ge, Zr, Rh, Sn, Hf, Ta, W, Ir, and Mo).

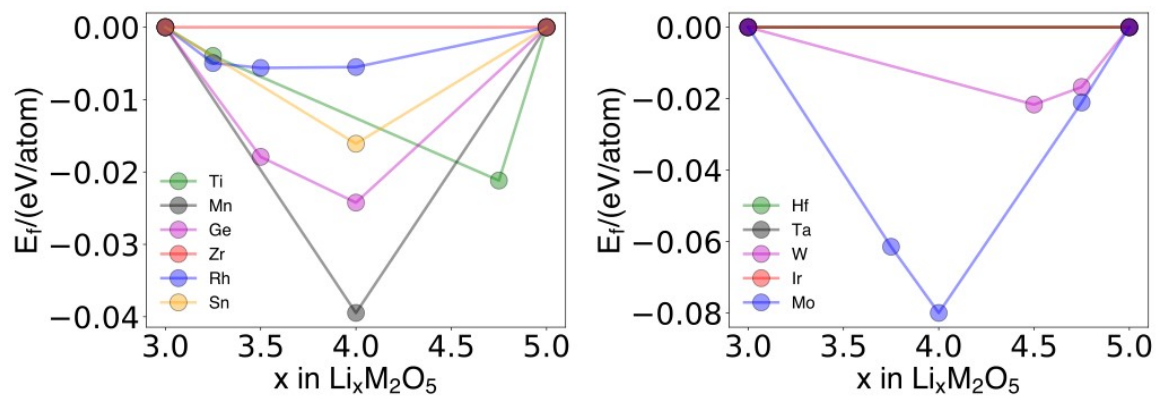

**Fig. S2:** the intercalation convex hull of DRX  $\text{Li}_{3+x}\text{M}_2\text{O}_5$  ( $0 \leq x \leq 2$ ) (M = Ti, Mn, Ge, Zr, Rh, Sn, Hf, Ta, W, Ir, and Mo).

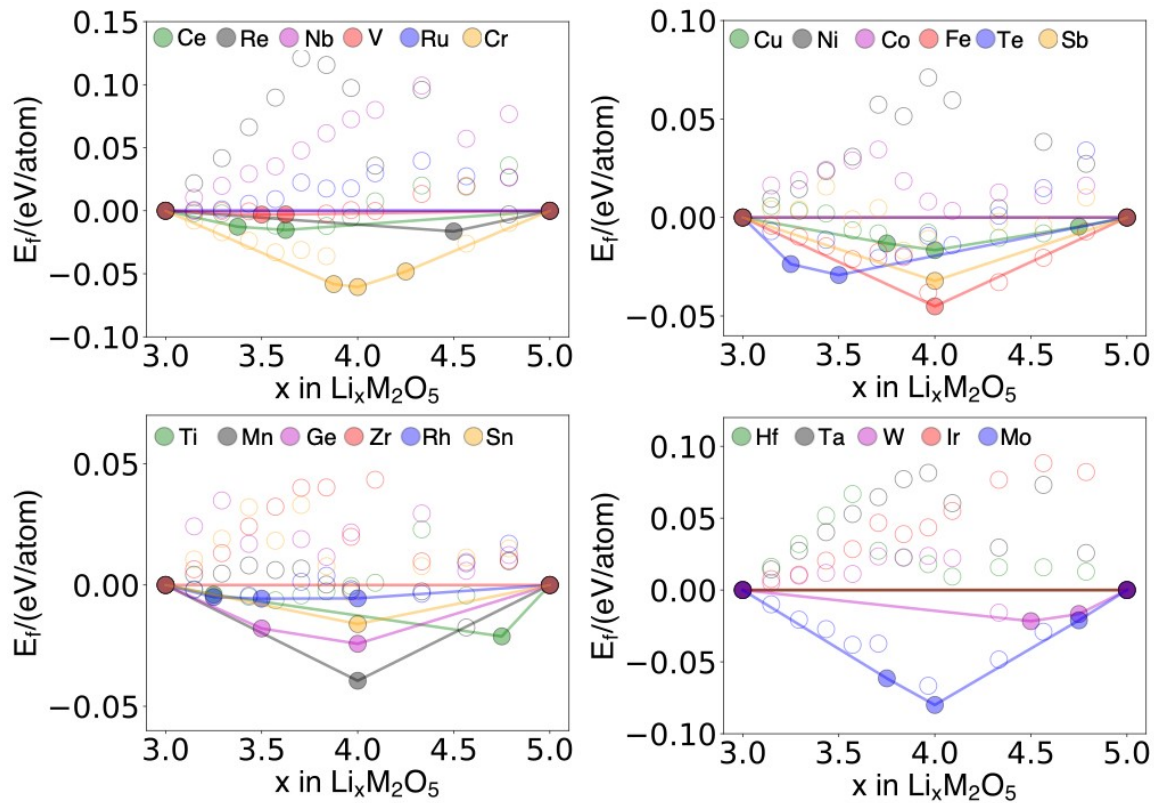

**Fig. S3:** the intercalation convex hull of all searched DRX  $\text{Li}_{3+x}\text{M}_2\text{O}_5$  ( $0 \leq x \leq 2$ ) (M= Ti, V, Cr, Mn, Fe, Co, Ni, Cu, Ge, Zr, Nb, Mo, Rh, Ru, Sn, Sb, Te, Hf, Ta, W, Re, Ir, and Ce) with stable and unstable phases (solid circle and open circle represents stable and unstable phases respectively).

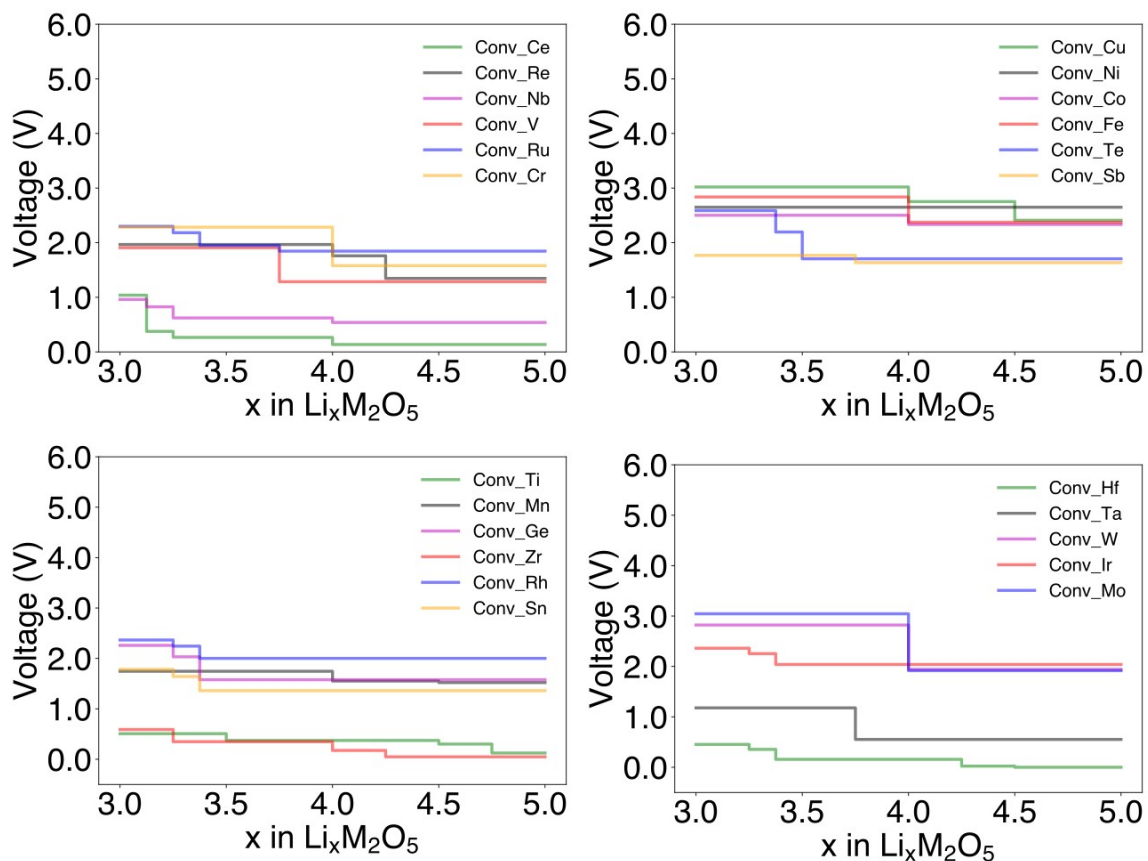

**Fig. S4:** the conversion voltage curve of all searched DRX  $\text{Li}_{3+x}\text{M}_2\text{O}_5$  ( $0 \leq x \leq 2$ ) (M= Ti, V, Cr, Mn, Fe, Co, Ni, Cu, Ge, Zr, Nb, Mo, Rh, Ru, Sn, Sb, Te, Hf, Ta, W, Re, Ir, and Ce).

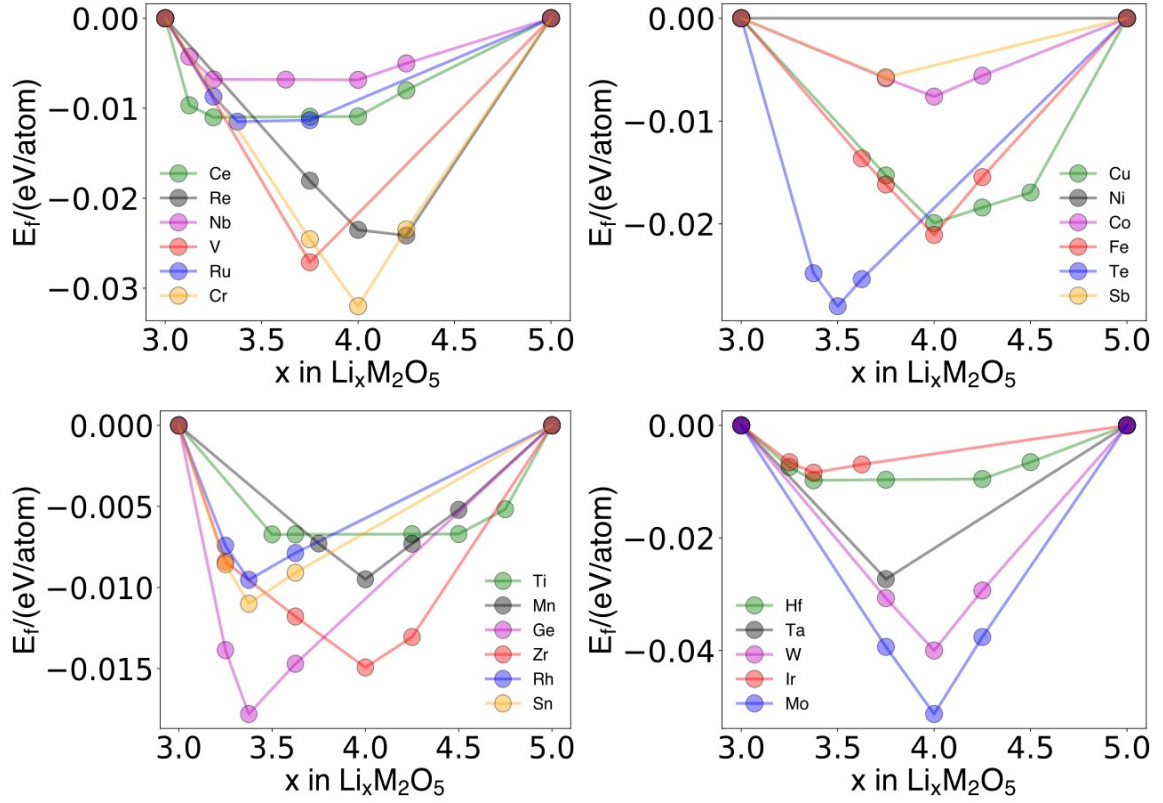

**Fig. S5:** the conversion convex hull of all searched DRX  $\text{Li}_{3+x}\text{M}_2\text{O}_5$  ( $0 \leq x \leq 2$ ) (M= Ti, V, Cr, Mn, Fe, Co, Ni, Cu, Ge, Zr, Nb, Mo, Rh, Ru, Sn, Sb, Te, Hf, Ta, W, Re, Ir, and Ce).

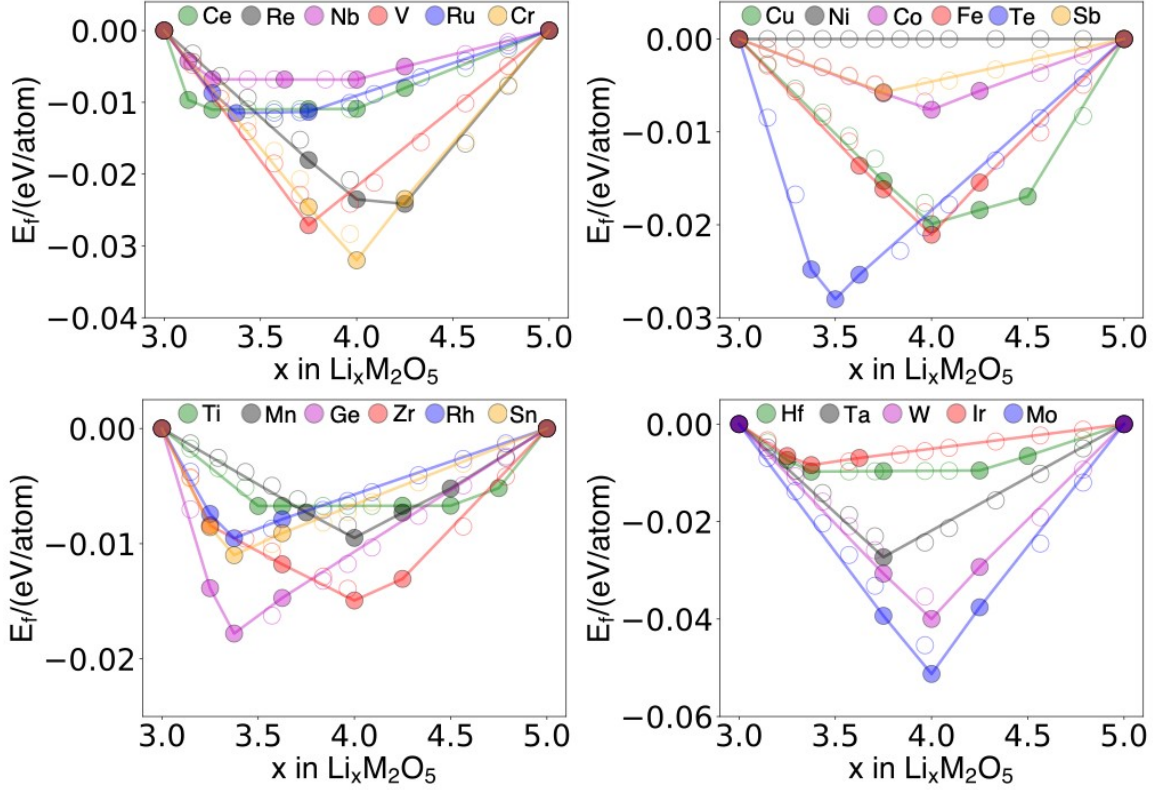

**Fig. S6:** the conversion convex hull of all searched DRX  $\text{Li}_{3+x}\text{M}_2\text{O}_5$  ( $0 \leq x \leq 2$ ) ( $M = \text{Ti, V, Cr, Mn, Fe, Co, Ni, Cu, Ge, Zr, Nb, Mo, Rh, Ru, Sn, Sb, Te, Hf, Ta, W, Re, Ir, and Ce}$ ) with stable and unstable phases (solid circle and open circle represents stable and unstable phases respectively).

**Table S2.** The competing phase of the ground state of conversion convex hull.

|                                        |                                                                                                                                                                                                                                                                                                                                                                                                                                                                                                                                                                               |
|----------------------------------------|-------------------------------------------------------------------------------------------------------------------------------------------------------------------------------------------------------------------------------------------------------------------------------------------------------------------------------------------------------------------------------------------------------------------------------------------------------------------------------------------------------------------------------------------------------------------------------|
| $\text{Li}_{3+x}\text{V}_2\text{O}_5$  | $\text{Li}_{5.0}\text{V}_2\text{O}_5$ : $\text{Li}_2\text{O}, \text{Li}_3\text{VO}_4, \text{V}$<br>$\text{Li}_{3.75}\text{V}_2\text{O}_5$ : $\text{Li}_3\text{VO}_4, \text{V}$<br>$\text{Li}_3\text{V}_2\text{O}_5$ : $\text{Li}_3\text{V}_2\text{O}_5$                                                                                                                                                                                                                                                                                                                       |
| $\text{Li}_{3+x}\text{Cr}_2\text{O}_5$ | $\text{Li}_{5.0}\text{Cr}_2\text{O}_5$ : $\text{LiCrO}_2, \text{Li}_2\text{O}, \text{Cr}$<br>$\text{Li}_{4.25}\text{Cr}_2\text{O}_5$ : $\text{LiCrO}_2, \text{Li}_2\text{O}, \text{Cr}$<br>$\text{Li}_{4.0}\text{Cr}_2\text{O}_5$ : $\text{LiCrO}_2, \text{Li}_2\text{O}$<br>$\text{Li}_{3.75}\text{Cr}_2\text{O}_5$ : $\text{Li}_3\text{CrO}_4, \text{LiCrO}_2, \text{Li}_2\text{O}$<br>$\text{Li}_{3.0}\text{Cr}_2\text{O}_5$ : $\text{Li}_3\text{Cr}_2\text{O}_5$                                                                                                          |
| $\text{Li}_{3+x}\text{Mn}_2\text{O}_5$ | $\text{Li}_{5.0}\text{Mn}_2\text{O}_5$ : $\text{LiMnO}_2, \text{Li}_6\text{MnO}_4, \text{MnO}$<br>$\text{Li}_{4.5}\text{Mn}_2\text{O}_5$ : $\text{LiMnO}_2, \text{Li}_6\text{MnO}_4$<br>$\text{Li}_{4.25}\text{Mn}_2\text{O}_5$ : $\text{LiMnO}_2, \text{Li}_6\text{MnO}_4, \text{Li}_2\text{O}$<br>$\text{Li}_{4.0}\text{Mn}_2\text{O}_5$ : $\text{LiMnO}_2, \text{Li}_2\text{O}$<br>$\text{Li}_{3.75}\text{Mn}_2\text{O}_5$ : $\text{LiMnO}_2, \text{Li}_2\text{MnO}_3, \text{Li}_2\text{O}$<br>$\text{Li}_{3.0}\text{Mn}_2\text{O}_5$ : $\text{Li}_3\text{Mn}_2\text{O}_5$ |

|                                                    |                                                                                                                                                                                                                                                                                                                                                                                                                                                                                                                                                                                                                                                                                                                                                                                                                                                              |
|----------------------------------------------------|--------------------------------------------------------------------------------------------------------------------------------------------------------------------------------------------------------------------------------------------------------------------------------------------------------------------------------------------------------------------------------------------------------------------------------------------------------------------------------------------------------------------------------------------------------------------------------------------------------------------------------------------------------------------------------------------------------------------------------------------------------------------------------------------------------------------------------------------------------------|
| <b>Li<sub>3+x</sub>Nb<sub>2</sub>O<sub>5</sub></b> | Li <sub>5.0</sub> Nb <sub>2</sub> O <sub>5</sub> : Li <sub>2</sub> O, LiNbO <sub>2</sub> , Nb<br>Li <sub>4.25</sub> Nb <sub>2</sub> O <sub>5</sub> : Li <sub>2</sub> O, LiNbO <sub>2</sub> , Nb<br>Li <sub>4.0</sub> Nb <sub>2</sub> O <sub>5</sub> : Li <sub>2</sub> O, LiNbO <sub>2</sub><br>Li <sub>3.625</sub> Nb <sub>2</sub> O <sub>5</sub> : Li <sub>8</sub> Nb <sub>2</sub> O <sub>9</sub> , Li <sub>2</sub> O, LiNbO <sub>2</sub><br>Li <sub>3.25</sub> Nb <sub>2</sub> O <sub>5</sub> : Li <sub>8</sub> Nb <sub>2</sub> O <sub>9</sub> , Li <sub>2</sub> O, LiNbO <sub>2</sub><br>Li <sub>3.125</sub> Nb <sub>2</sub> O <sub>5</sub> : Li <sub>8</sub> Nb <sub>2</sub> O <sub>9</sub> , LiNbO <sub>2</sub> , Li <sub>3</sub> NbO <sub>4</sub><br>Li <sub>3.0</sub> Nb <sub>2</sub> O <sub>5</sub> : Li <sub>3</sub> Nb <sub>2</sub> O <sub>5</sub> |
| <b>Li<sub>3+x</sub>Ru<sub>2</sub>O<sub>5</sub></b> | Li <sub>5.0</sub> Ru <sub>2</sub> O <sub>5</sub> : Li <sub>3</sub> RuO <sub>4</sub> , Li <sub>2</sub> O, Ru<br>Li <sub>3.75</sub> Ru <sub>2</sub> O <sub>5</sub> : Li <sub>3</sub> RuO <sub>4</sub> , Ru<br>Li <sub>3.375</sub> Ru <sub>2</sub> O <sub>5</sub> : Li <sub>2</sub> RuO <sub>3</sub> , Li <sub>3</sub> RuO <sub>4</sub> , Ru<br>Li <sub>3.25</sub> Ru <sub>2</sub> O <sub>5</sub> : Li <sub>2</sub> RuO <sub>3</sub> , RuO <sub>2</sub> , Ru<br>Li <sub>3.0</sub> Ru <sub>2</sub> O <sub>5</sub> : Li <sub>3</sub> Ru <sub>2</sub> O <sub>5</sub>                                                                                                                                                                                                                                                                                               |
| <b>Li<sub>3+x</sub>Rh<sub>2</sub>O<sub>5</sub></b> | Li <sub>5.0</sub> Rh <sub>2</sub> O <sub>5</sub> : Li <sub>2</sub> RhO <sub>3</sub> , Li <sub>2</sub> O, Rh<br>Li <sub>3.625</sub> Rh <sub>2</sub> O <sub>5</sub> : Li <sub>2</sub> RhO <sub>3</sub> , Li <sub>2</sub> O, Rh<br>Li <sub>3.375</sub> Rh <sub>2</sub> O <sub>5</sub> : Li <sub>2</sub> RhO <sub>3</sub> , Li <sub>2</sub> O, Rh<br>Li <sub>3.25</sub> Rh <sub>2</sub> O <sub>5</sub> : Li <sub>2</sub> RhO <sub>3</sub> , LiRhO <sub>2</sub> , Rh<br>Li <sub>3</sub> Rh <sub>2</sub> O <sub>5</sub> : Li <sub>3</sub> Rh <sub>2</sub> O <sub>5</sub>                                                                                                                                                                                                                                                                                           |
| <b>Li<sub>3+x</sub>Te<sub>2</sub>O<sub>5</sub></b> | Li <sub>5.0</sub> Te <sub>2</sub> O <sub>5</sub> : Li <sub>2</sub> TeO <sub>3</sub> , Li <sub>6</sub> TeO <sub>6</sub> , LiTe <sub>3</sub><br>Li <sub>3.625</sub> Te <sub>2</sub> O <sub>5</sub> : Li <sub>2</sub> TeO <sub>3</sub> , Li <sub>6</sub> TeO <sub>6</sub> , LiTe <sub>3</sub><br>Li <sub>3.5</sub> Te <sub>2</sub> O <sub>5</sub> : Li <sub>2</sub> TeO <sub>3</sub> , Li <sub>6</sub> TeO <sub>6</sub> , LiTe <sub>3</sub><br>Li <sub>3.375</sub> Te <sub>2</sub> O <sub>5</sub> : Li <sub>2</sub> TeO <sub>3</sub> , Li <sub>2</sub> Te <sub>2</sub> O <sub>5</sub> , LiTe <sub>3</sub><br>Li <sub>3.0</sub> Te <sub>2</sub> O <sub>5</sub> : Li <sub>3.0</sub> Te <sub>2</sub> O <sub>5</sub>                                                                                                                                                |
| <b>Li<sub>3+x</sub>Sb<sub>2</sub>O<sub>5</sub></b> | Li <sub>5.0</sub> Sb <sub>2</sub> O <sub>5</sub> : Li <sub>5</sub> SbO <sub>5</sub> , Sb<br>Li <sub>3.75</sub> Sb <sub>2</sub> O <sub>5</sub> : Li <sub>3</sub> SbO <sub>4</sub> , Sb<br>Li <sub>3.0</sub> Sb <sub>2</sub> O <sub>5</sub> : Li <sub>3</sub> Sb <sub>2</sub> O <sub>5</sub>                                                                                                                                                                                                                                                                                                                                                                                                                                                                                                                                                                   |
| <b>Li<sub>3+x</sub>Sn<sub>2</sub>O<sub>5</sub></b> | Li <sub>5.0</sub> Sn <sub>2</sub> O <sub>5</sub> : Li <sub>2</sub> SnO <sub>3</sub> , Li <sub>8</sub> SnO <sub>6</sub> , Sn<br>Li <sub>3.625</sub> Sn <sub>2</sub> O <sub>5</sub> : Li <sub>2</sub> SnO <sub>3</sub> , Li <sub>8</sub> SnO <sub>6</sub> , Sn<br>Li <sub>3.375</sub> Sn <sub>2</sub> O <sub>5</sub> : Li <sub>2</sub> SnO <sub>3</sub> , Li <sub>8</sub> SnO <sub>6</sub> , Sn<br>Li <sub>3.25</sub> Sn <sub>2</sub> O <sub>5</sub> : Li <sub>2</sub> SnO <sub>3</sub> , SnO, Sn<br>Li <sub>3.0</sub> Sn <sub>2</sub> O <sub>5</sub> : Li <sub>3</sub> Sn <sub>2</sub> O <sub>5</sub>                                                                                                                                                                                                                                                         |
| <b>Li<sub>3+x</sub>Ge<sub>2</sub>O<sub>5</sub></b> | Li <sub>5.0</sub> Ge <sub>2</sub> O <sub>5</sub> : Li <sub>4</sub> GeO <sub>4</sub> , Ge<br>Li <sub>3.625</sub> Ge <sub>2</sub> O <sub>5</sub> : Li <sub>2</sub> GeO <sub>3</sub> , Li <sub>4</sub> GeO <sub>4</sub> , Ge<br>Li <sub>3.375</sub> Ge <sub>2</sub> O <sub>5</sub> : Li <sub>2</sub> GeO <sub>3</sub> , Li <sub>4</sub> GeO <sub>4</sub> , Ge<br>Li <sub>3.25</sub> Ge <sub>2</sub> O <sub>5</sub> : Li <sub>2</sub> GeO <sub>3</sub> , Li <sub>4</sub> Ge <sub>5</sub> O <sub>12</sub> , Ge<br>Li <sub>3.0</sub> Ge <sub>2</sub> O <sub>5</sub> : Li <sub>3</sub> Ge <sub>2</sub> O <sub>5</sub>                                                                                                                                                                                                                                               |
| <b>Li<sub>3+x</sub>Fe<sub>2</sub>O<sub>5</sub></b> | Li <sub>5.0</sub> Fe <sub>2</sub> O <sub>5</sub> : Li <sub>5</sub> FeO <sub>4</sub> , LiFeO <sub>2</sub> , Fe<br>Li <sub>4.25</sub> Fe <sub>2</sub> O <sub>5</sub> : Li <sub>5</sub> FeO <sub>4</sub> , LiFeO <sub>2</sub> , Fe<br>Li <sub>4.0</sub> Fe <sub>2</sub> O <sub>5</sub> : Li <sub>5</sub> FeO <sub>4</sub> , LiFeO <sub>2</sub><br>Li <sub>3.75</sub> Fe <sub>2</sub> O <sub>5</sub> : Li <sub>5</sub> FeO <sub>4</sub> , LiFeO <sub>2</sub> , LiO <sub>8</sub><br>Li <sub>3.625</sub> Fe <sub>2</sub> O <sub>5</sub> : Li <sub>5</sub> FeO <sub>4</sub> , LiFeO <sub>2</sub> , LiO <sub>8</sub><br>Li <sub>3.0</sub> Fe <sub>2</sub> O <sub>5</sub> : Li <sub>3</sub> Fe <sub>2</sub> O <sub>5</sub>                                                                                                                                            |

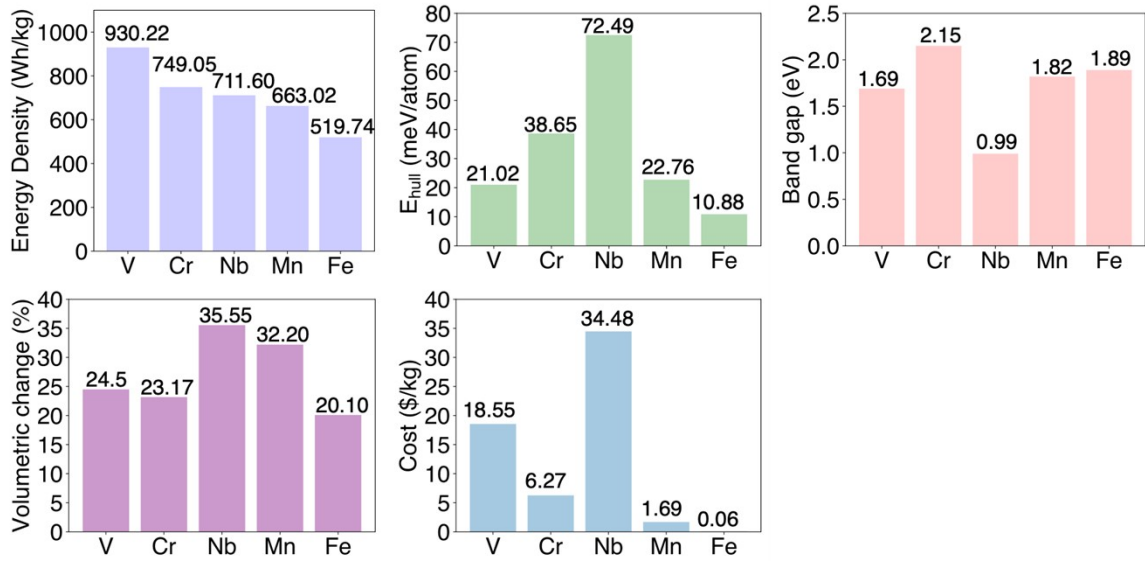

**Fig. S7:** The energy density,  $E_{\text{hull}}$  of  $\text{Li}_3\text{M}_2\text{O}_5$ , average band gap, maximum volumetric change, and cost of promising DRX  $\text{Li}_{3+x}\text{M}_2\text{O}_5$  ( $0 \leq x \leq 2$ ) ( $M = \text{V}, \text{Cr}, \text{Nb}, \text{Mn}$ , and  $\text{Fe}$ ).

**Table S3.**  $E_{\text{hull}}$  of  $\text{Li}_{1.2}\text{Mn}_{0.4}\text{Ti}_{0.4}\text{O}_2$  at different synthesis conditions.

| Material                                                  | $E_{\text{hull}}(1273\text{K})$<br>(meV/atom) | $E_{\text{hull}}(1873\text{K})$<br>(meV/atom) | $E_{\text{hull}}(\text{SQS})$<br>(meV/atom) | $E_{\text{hull}}(\text{SQS}) - E_{\text{hull}}(\text{ESGS})$<br>(meV/atom) |
|-----------------------------------------------------------|-----------------------------------------------|-----------------------------------------------|---------------------------------------------|----------------------------------------------------------------------------|
| $\text{Li}_{1.2}\text{Mn}_{0.4}\text{Ti}_{0.4}\text{O}_2$ | 54.3                                          | 69.0                                          | 139.3                                       | >85                                                                        |
